# Supplementary material for: Multiplex peptide microarray profiling of antibody reactivity against neglected tropical diseases derived B-cell epitopes for serodiagnosis in Zimbabwe
Source: PubMed Central journal article supplement (PMC9307155; doi:10.1371/journal.pone.0271916), 2022-07-22
Supplement: pone.0271916.s001.pdf [file pone.0271916.s001.pdf]

### *Ascaris lumbricoides*

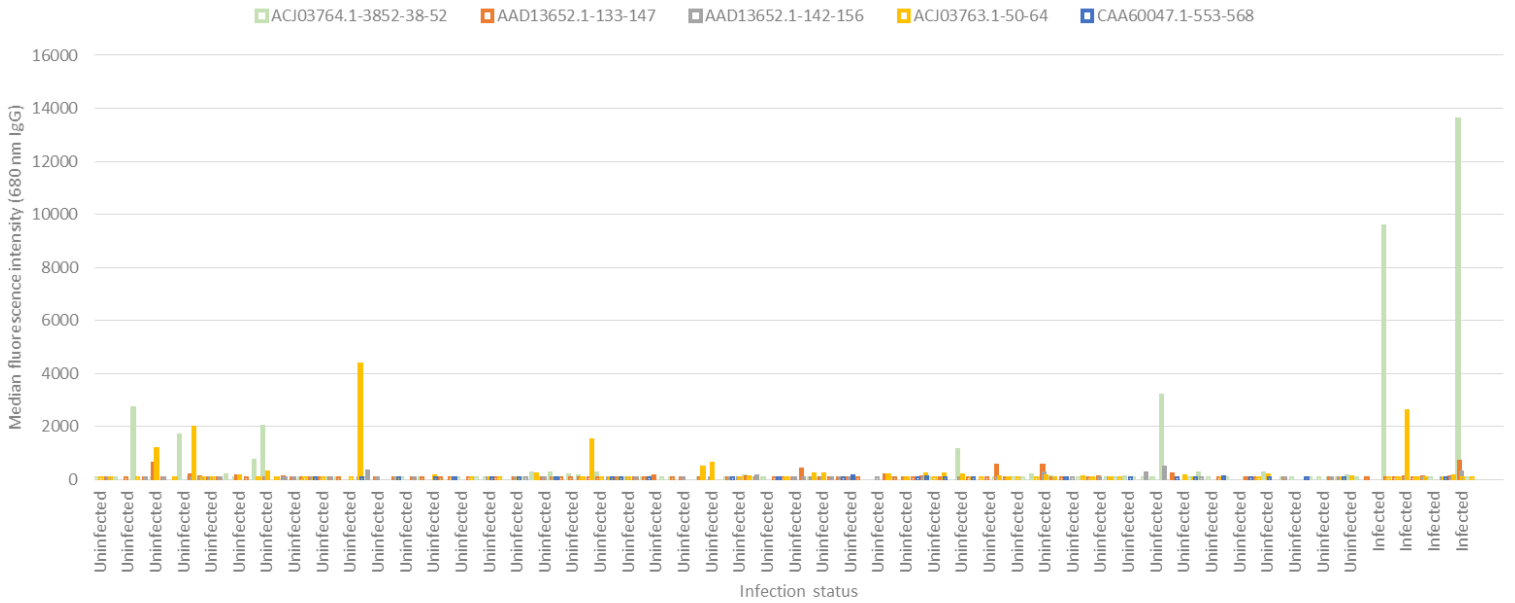

### *Ascaris lumbricoides*

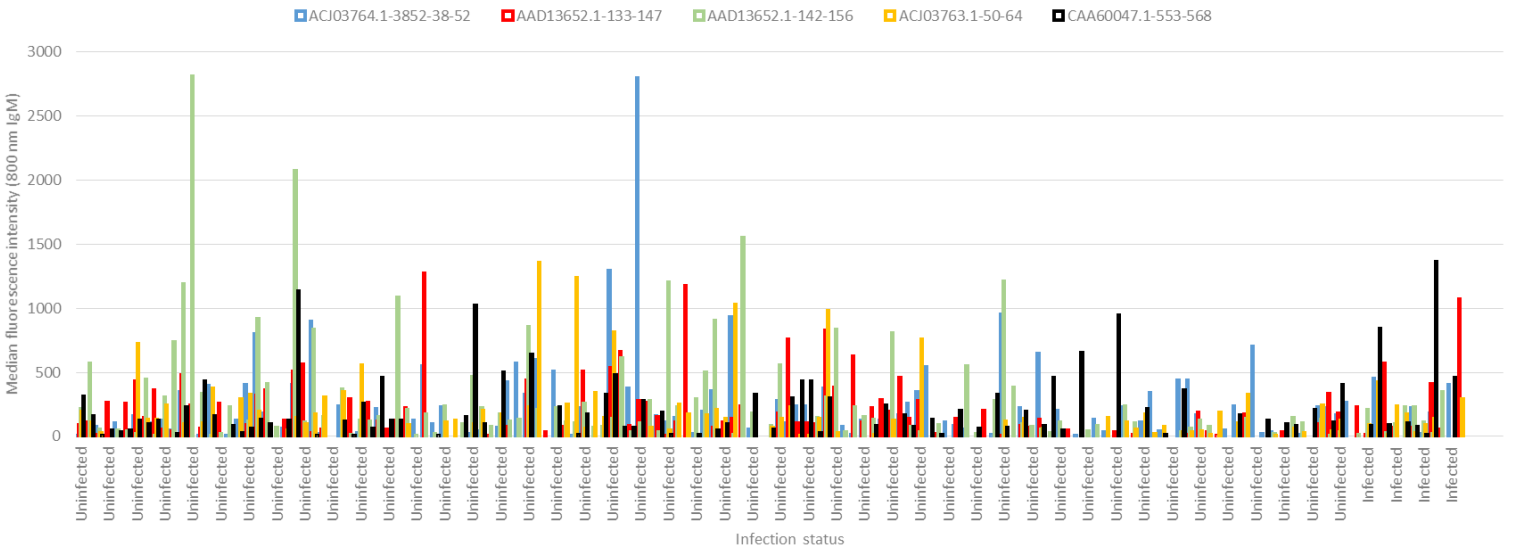

Figure 1: Heat maps and bar graphs generated from peptide microarray data for *Ascaris lumbricoides*. A. Heat maps generated from peptide microarray. Samples are arranged in rows and infection status shown on the left key. Peptides shown by their protein accession number and sequence position are arranged in columns. B. Bar graphs representing the peptide reactivity for each serum and plasma in both the infected and uninfected groups in the study.



## *Necator americanus*

■ AAP41952.1-180-192 ■ AAP41952.1-194-206 ■ CAC00543.1-123-135

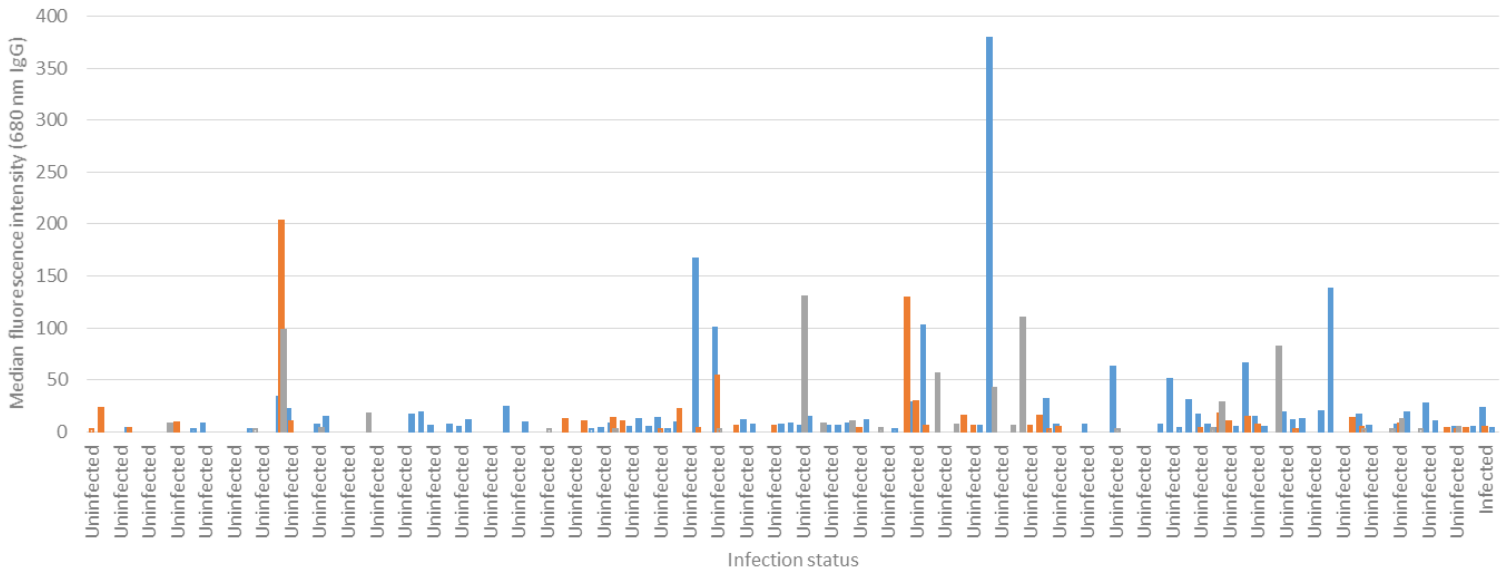

## *Necator americanus*

■ AAP41952.1-180-192 ■ AAP41952.1-194-206 ■ CAC00543.1-123-135

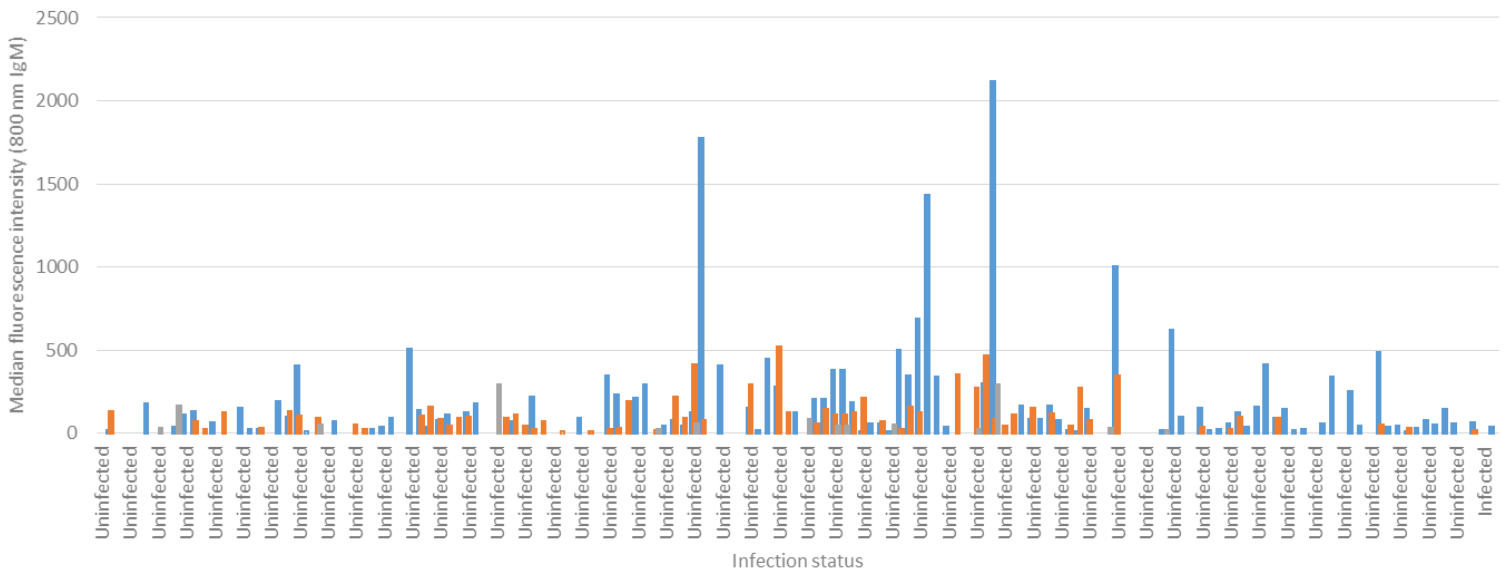

: Heat maps and bar graphs generated from peptide microarray data for *Necator americanus*. A. Heat maps generated from peptide microarray. Samples are arranged in rows and infection status shown on the left key. Peptides shown by their protein accession number and sequence position are arranged in columns. B. Bar graphs representing the peptide reactivity for each serum and plasma in both the infected and uninfected groups in the study.

row min row max

id  
XP\_012797374.1-78-92  
XP\_035568858.1-206-220  
XP\_035568781.1-209-283  
AAZ29530.1-25-29  
XP\_01279745.1-16-30

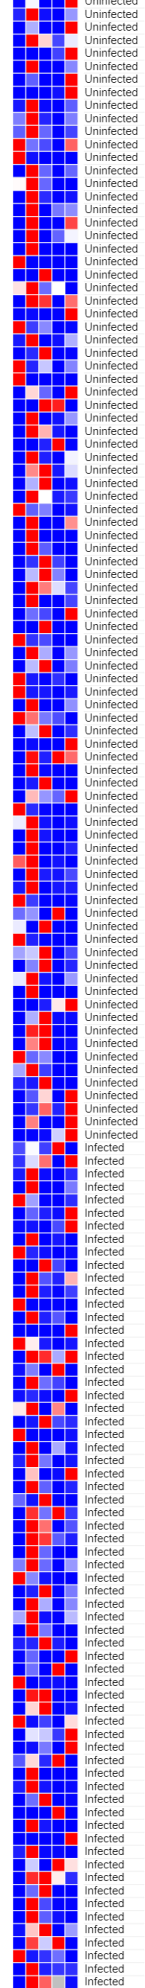

*S. haematobium* IgG heat map

row min row max

id  
XP\_012797374.1-78-92  
XP\_035568858.1-206-220  
XP\_035568781.1-209-283  
AAZ29530.1-25-29  
XP\_01279745.1-16-30

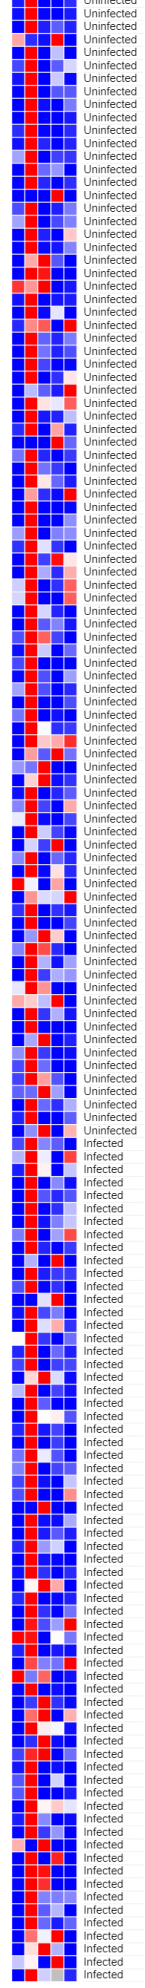

*S. haematobium* IgM heat map

## *S. haematobium*

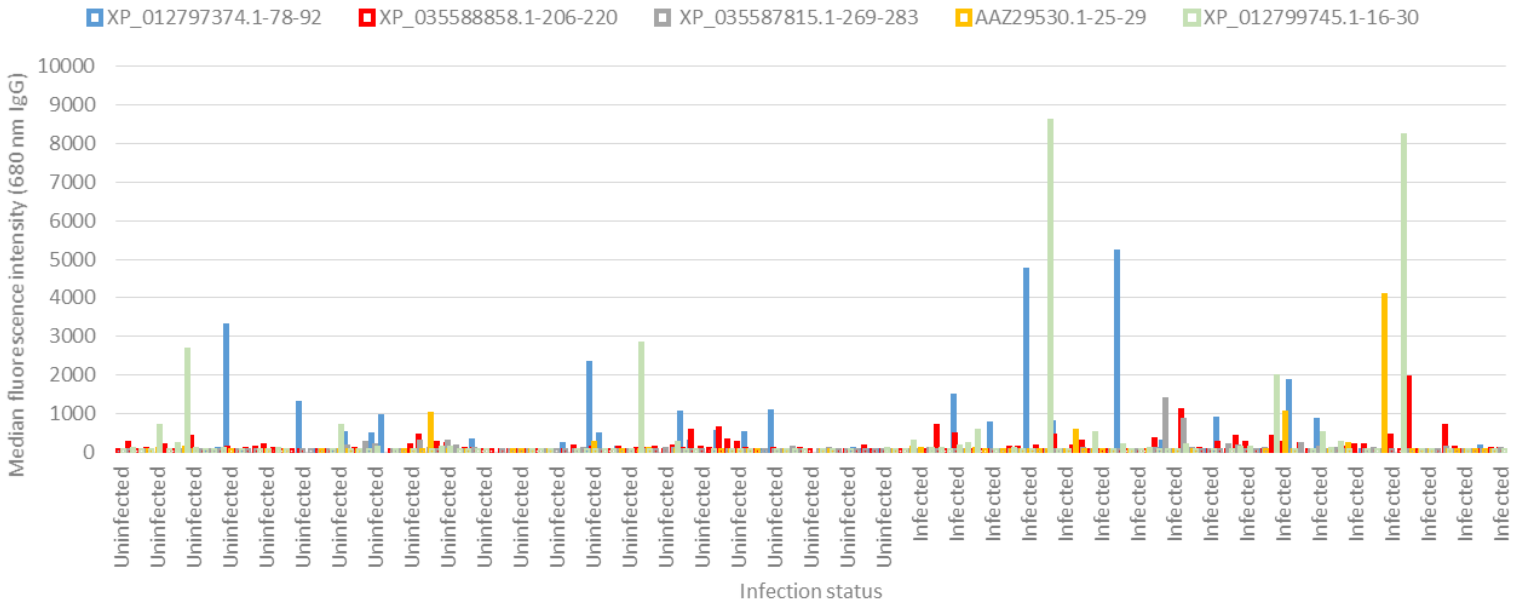

## *S. haematobium*

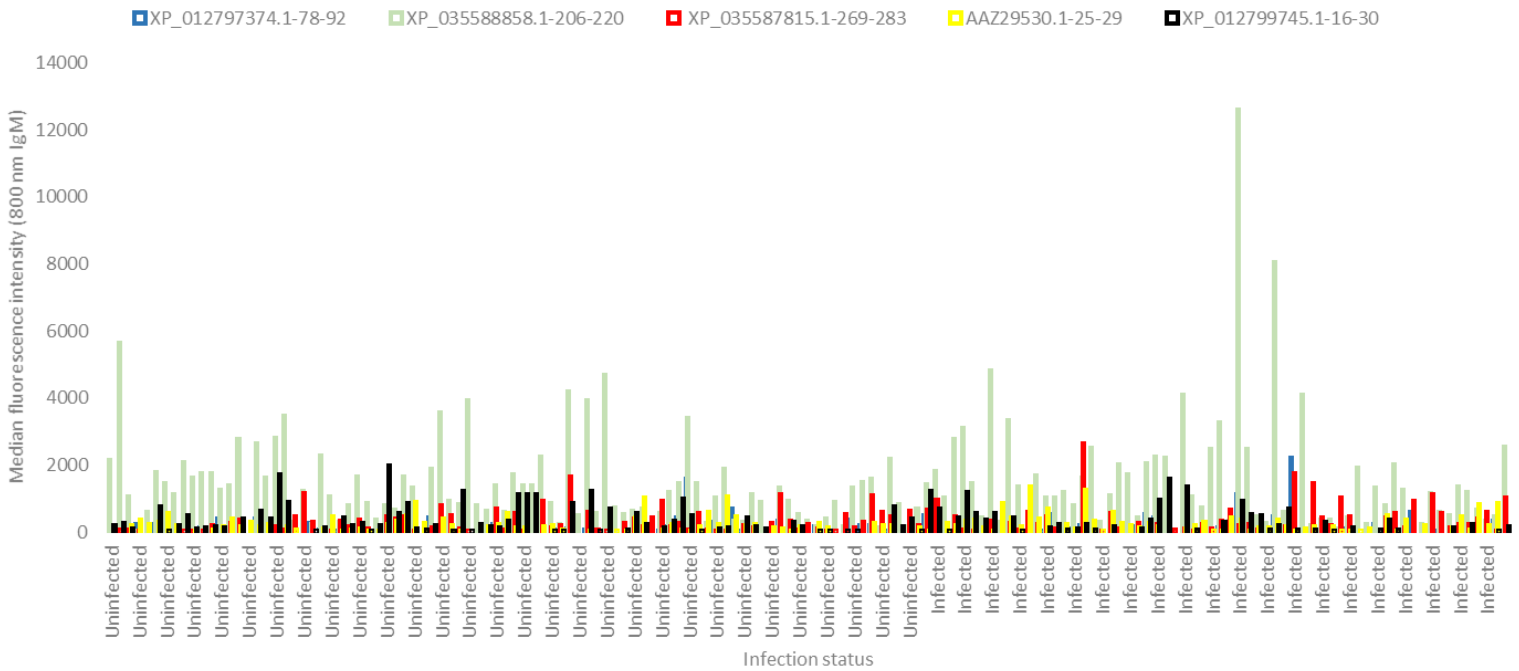

: Heat maps and bar graphs generated from peptide microarray data for *S. haematobium*. A. Heat maps generated from peptide microarray. Samples are arranged in rows and infection status shown on the left key. Peptides shown by their protein accession number and sequence position are arranged in columns. B. Bar graphs representing the peptide reactivity for each serum and plasma in both the infected and uninfected groups in the study.



## *S. mansoni*

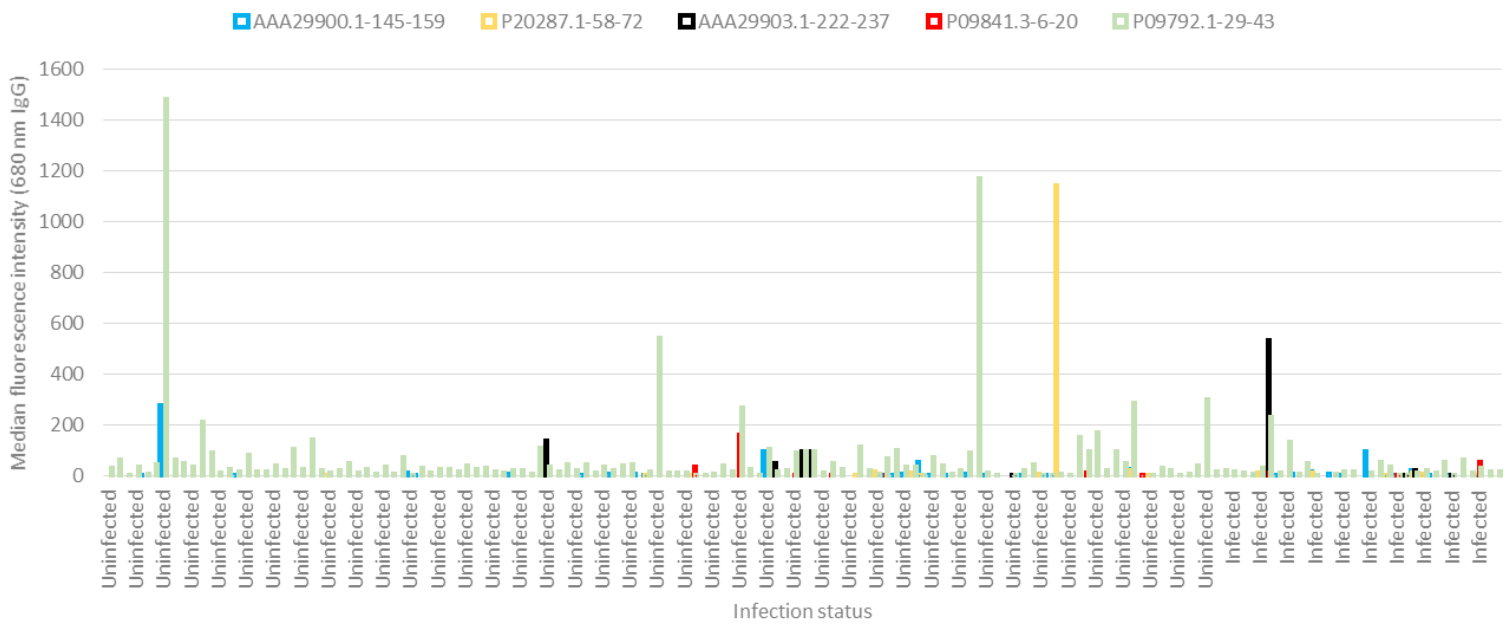

## *S. mansoni*

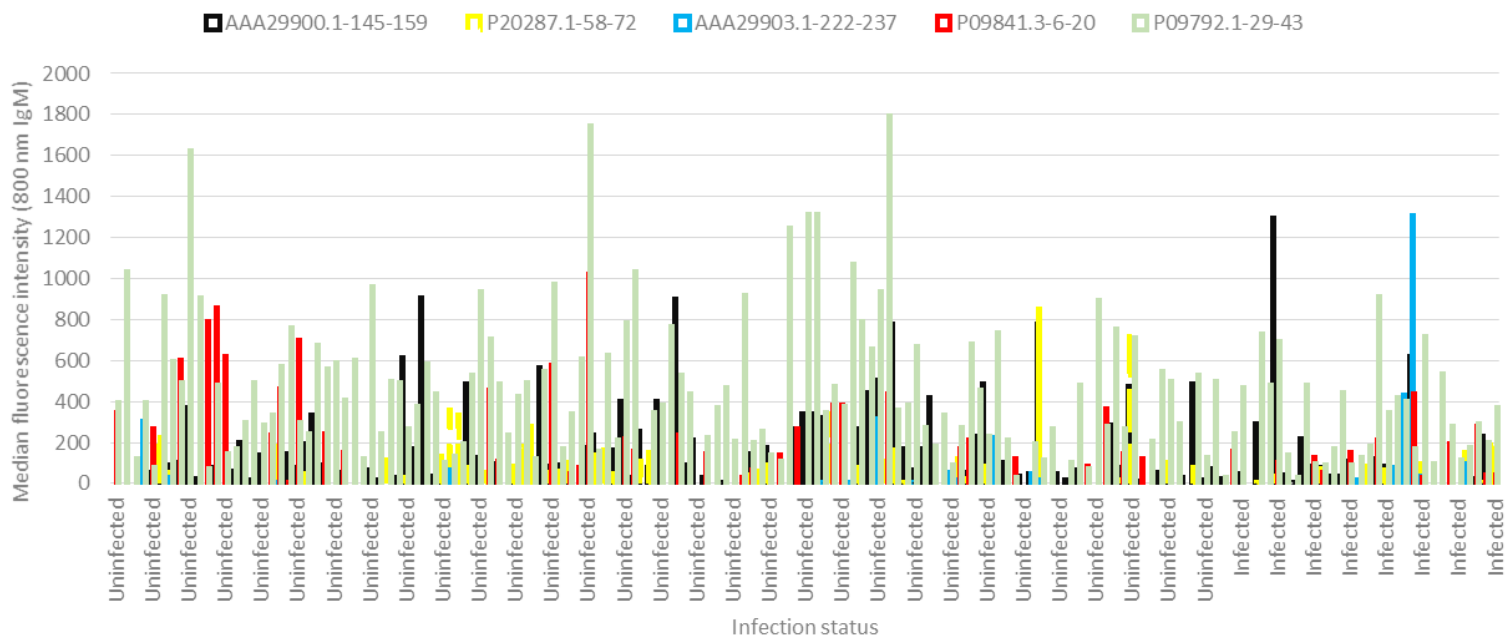

: Heat maps and bar graphs generated from peptide microarray data for *S. mansoni* A. Heat maps generated from peptide microarray. Samples are arranged in rows and infection status shown on the left key. Peptides shown by their protein accession number and sequence position are arranged in columns. B. Bar graphs representing the peptide reactivity for each serum and plasma in both the infected and uninfected groups in the study.





### *Trichuris trichuria*

■ CDW57769.1-2017-2031   ■ CDW57769.1-659-673   ■ CDW57769.1-834-848   ■ CDW52482.1-326-340   ■ CDW57769.1-1518-1532

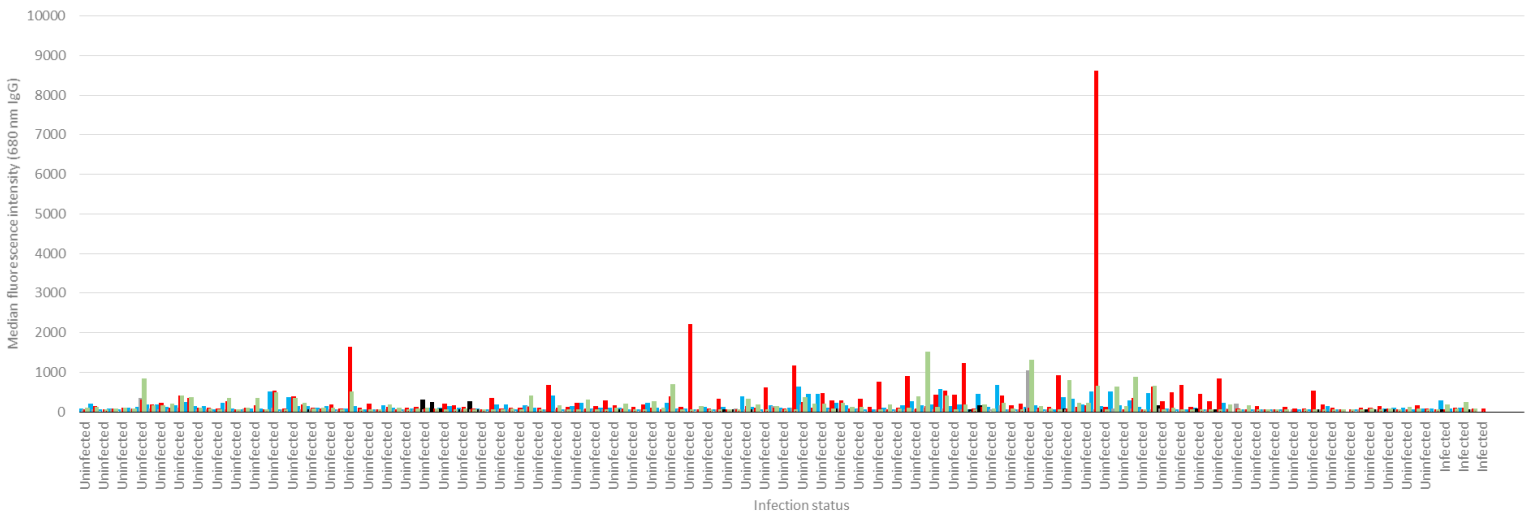

### *Trichuris trichuria*

■ CDW57769.1-2017-2031   ■ CDW57769.1-659-673   ■ CDW57769.1-834-848   ■ CDW52482.1-326-340   ■ CDW57769.1-1518-1532

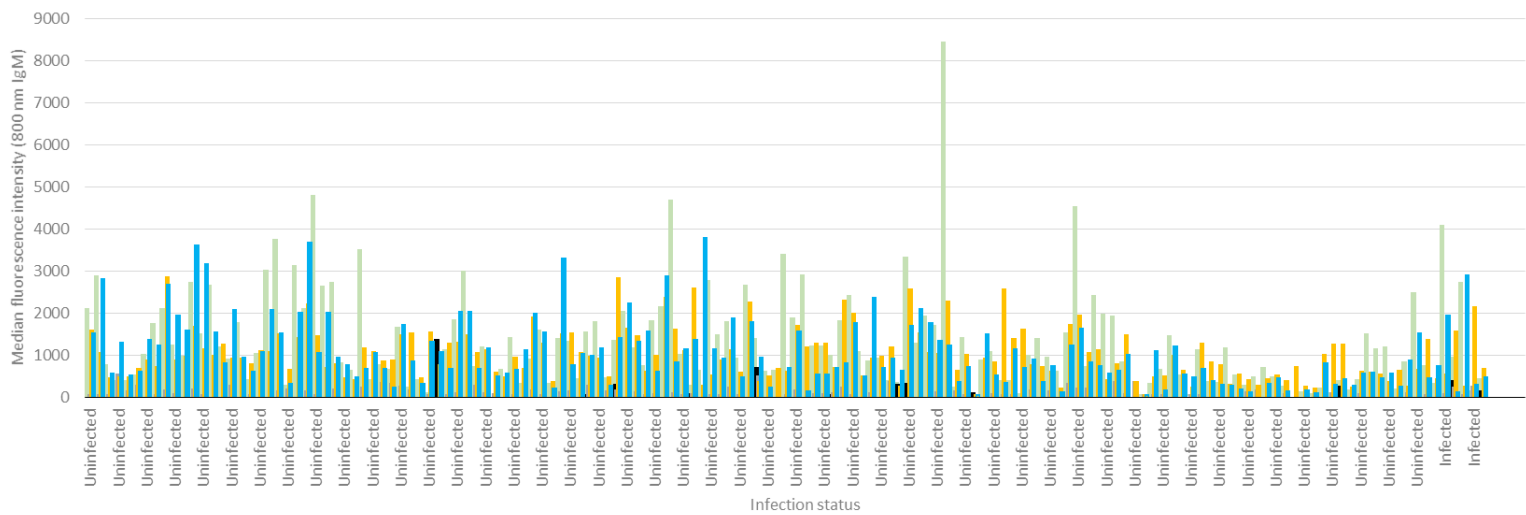

Figure 1: Heat maps and bar graphs generated from peptide microarray data for *Trichuris trichuria*. A. Heat maps generated from peptide microarray. Samples are arranged in rows and infection status shown on the left key. Peptides shown by their protein accession number and sequence position are arranged in columns. B. Bar graphs representing the peptide reactivity for each serum and plasma in both the infected and uninfected groups in the study.
