# Supplementary material for: Multiplex peptide microarray profiling of antibody reactivity against neglected tropical diseases derived B-cell epitopes for serodiagnosis in Zimbabwe
Source: PubMed Central journal article supplement (PMC9307155; doi:10.1371/journal.pone.0271916), 2022-07-22
Supplement: pone.0271916.s002.pdf [file pone.0271916.s002.pdf]

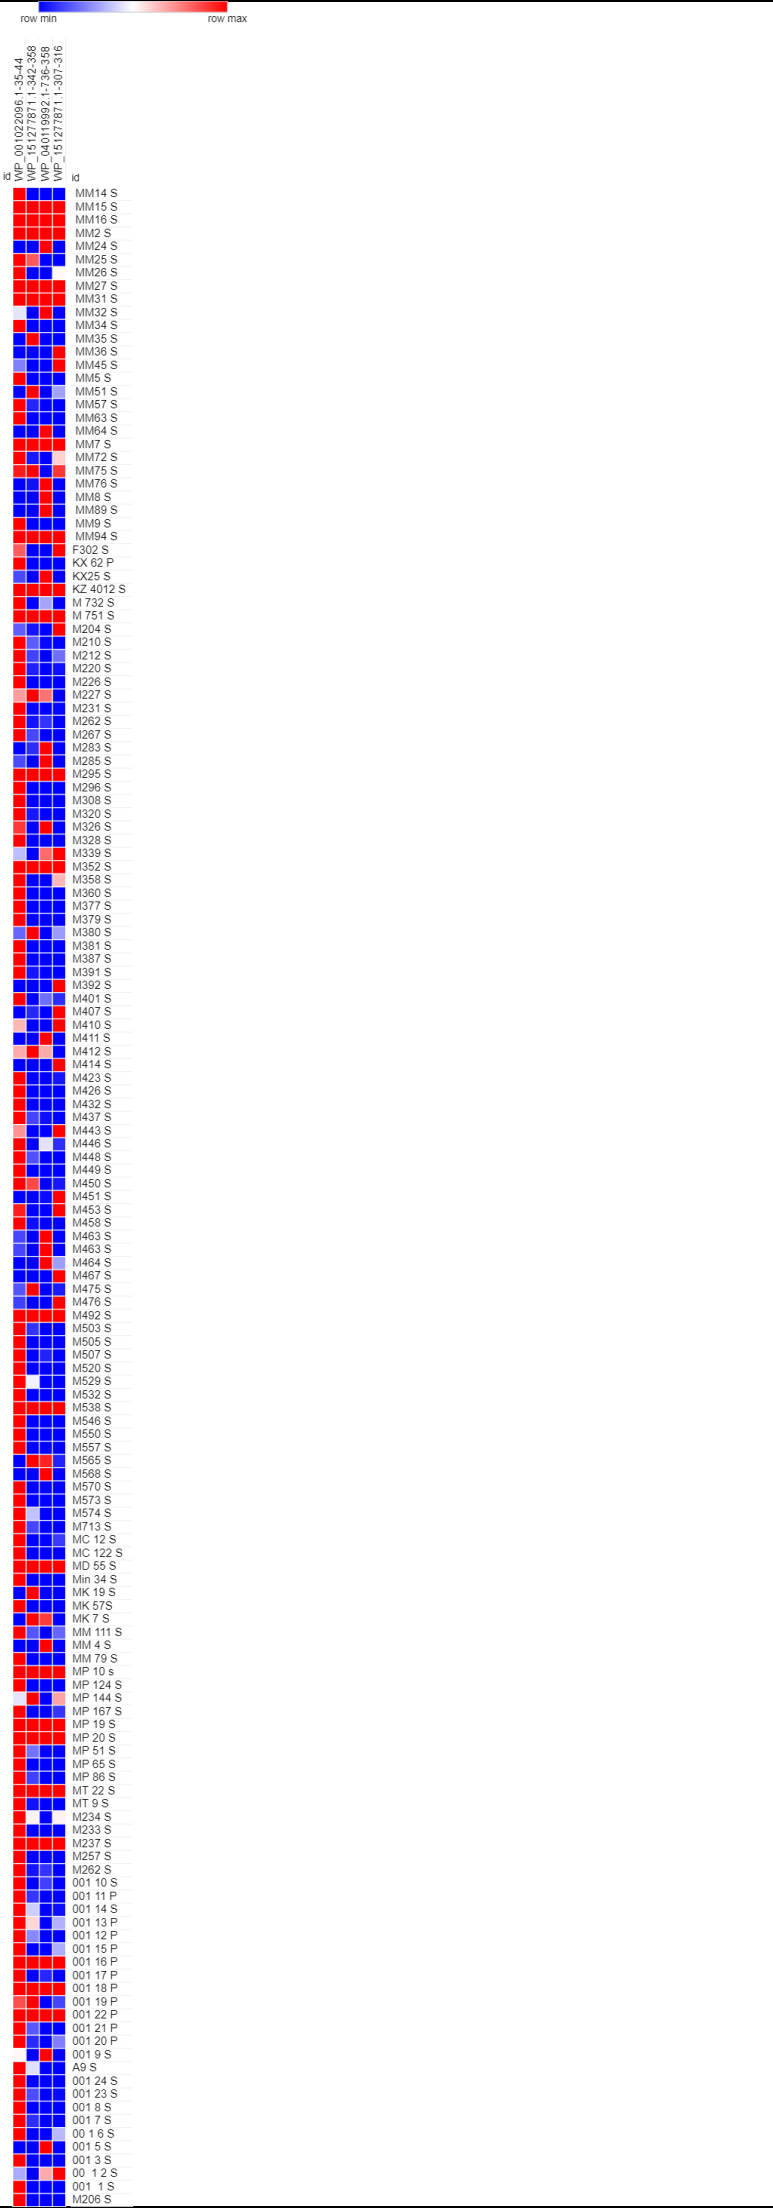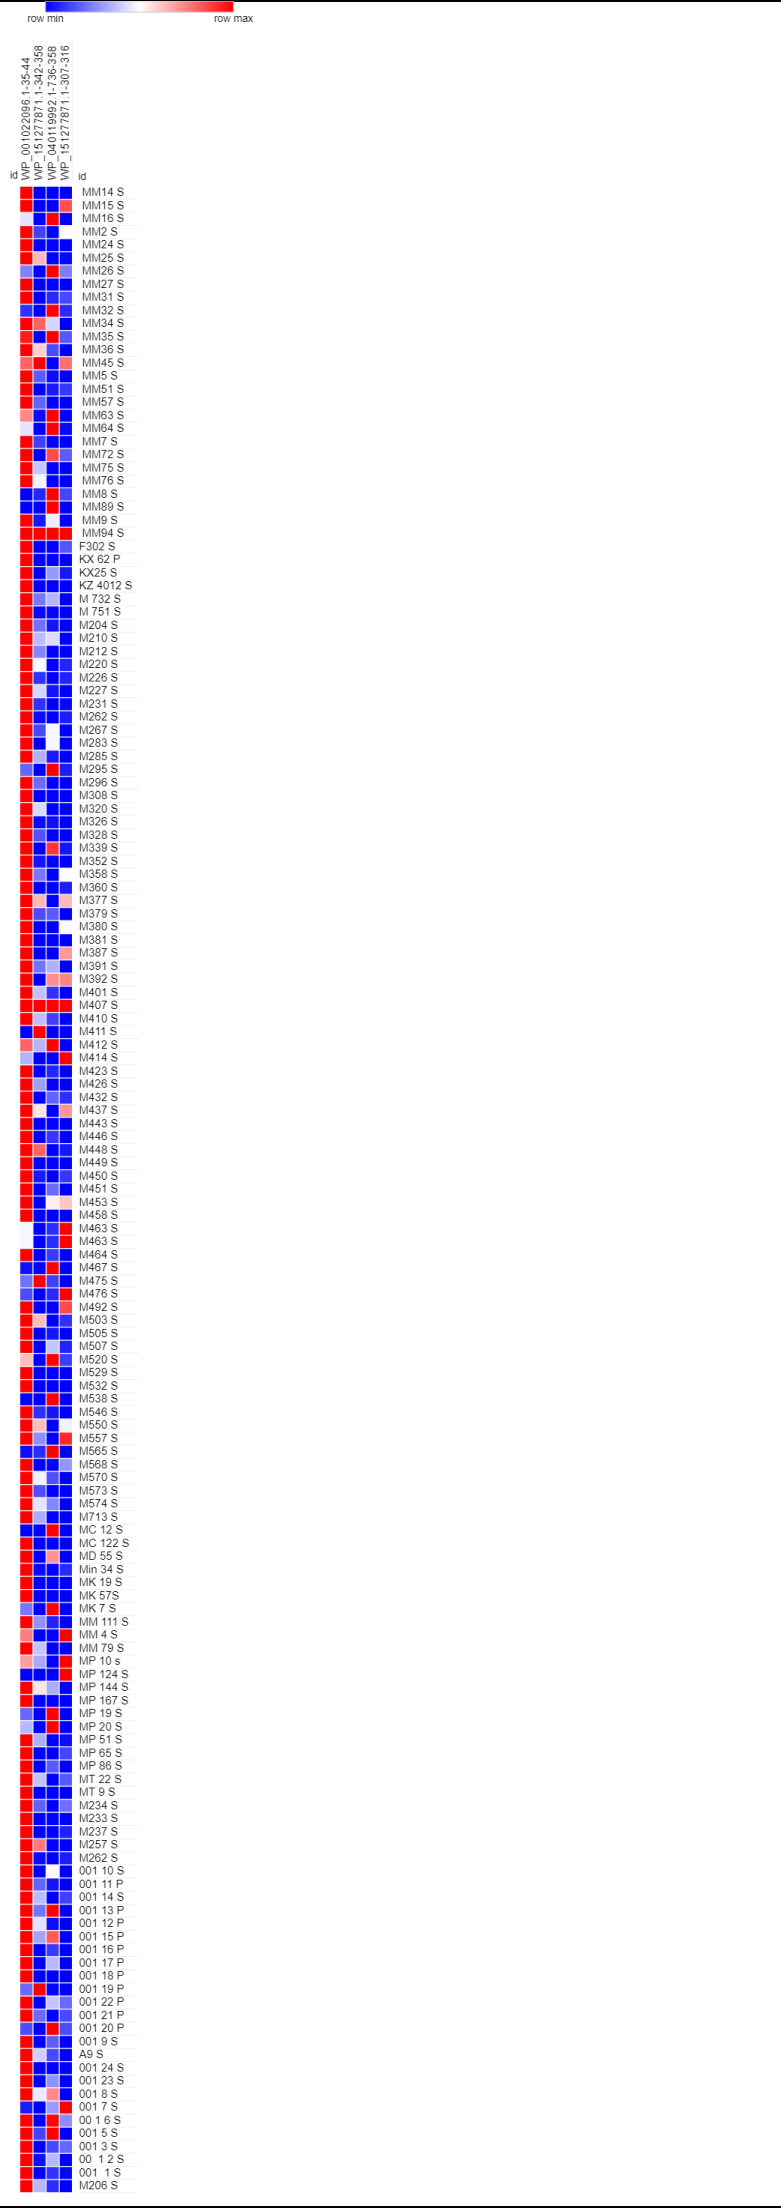

Bacillus anthracis IgG heat map

Bacillus anthracis IgM heat map

### Bacillus anthracis

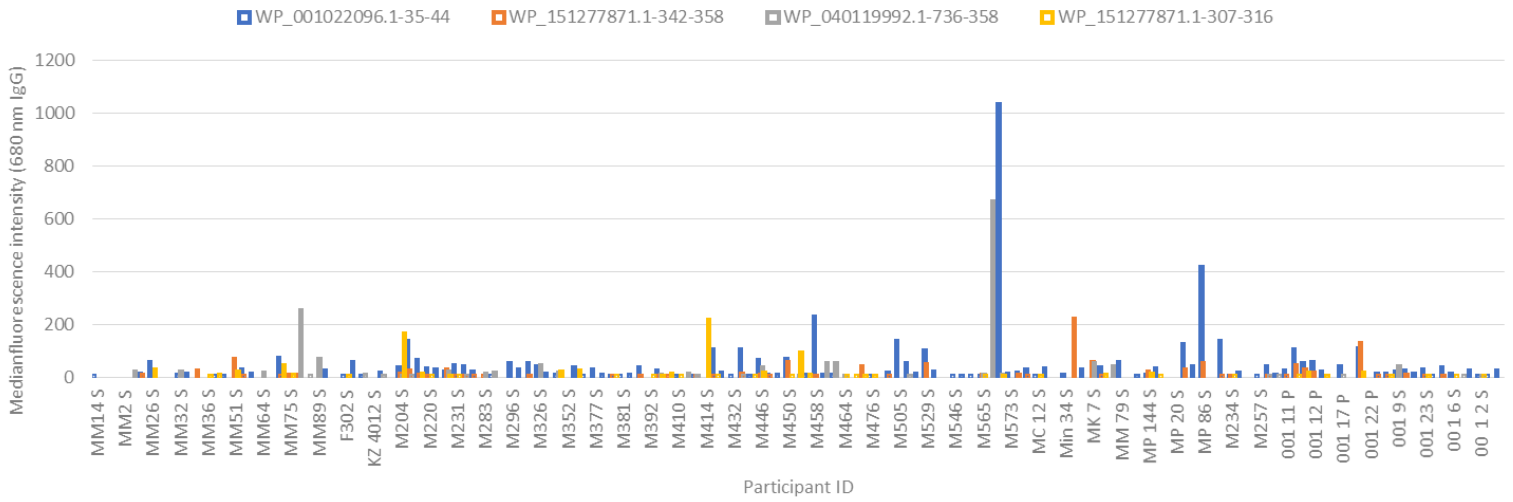

### Bacillus anthracis

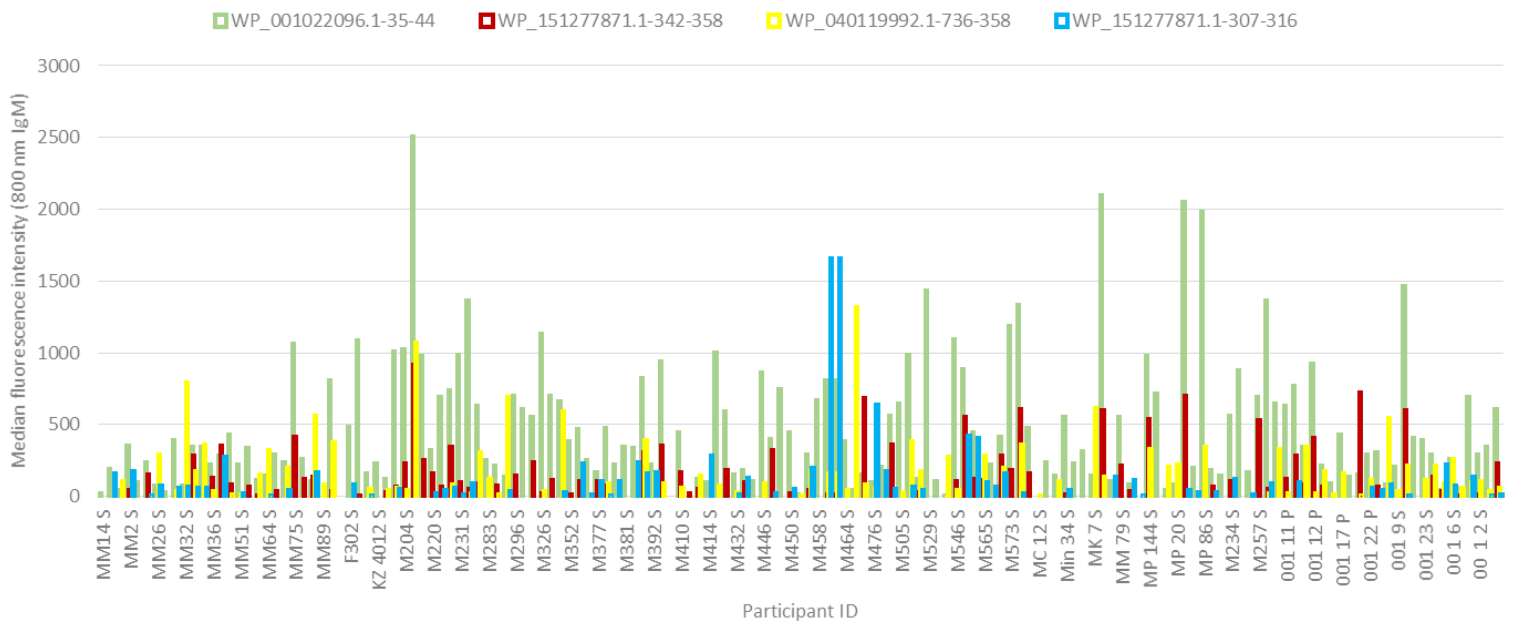

Heat maps and bar graphs generated from peptide microarray data for *Bacillus anthracis* A. Heat maps generated from peptide microarray. Samples are arranged in rows and infection status shown on the left key. Peptides shown by their protein accession number and sequence position are arranged in columns. B. Bar graphs representing the peptide reactivity for each serum and plasma in both the infected and uninfected groups in the study.

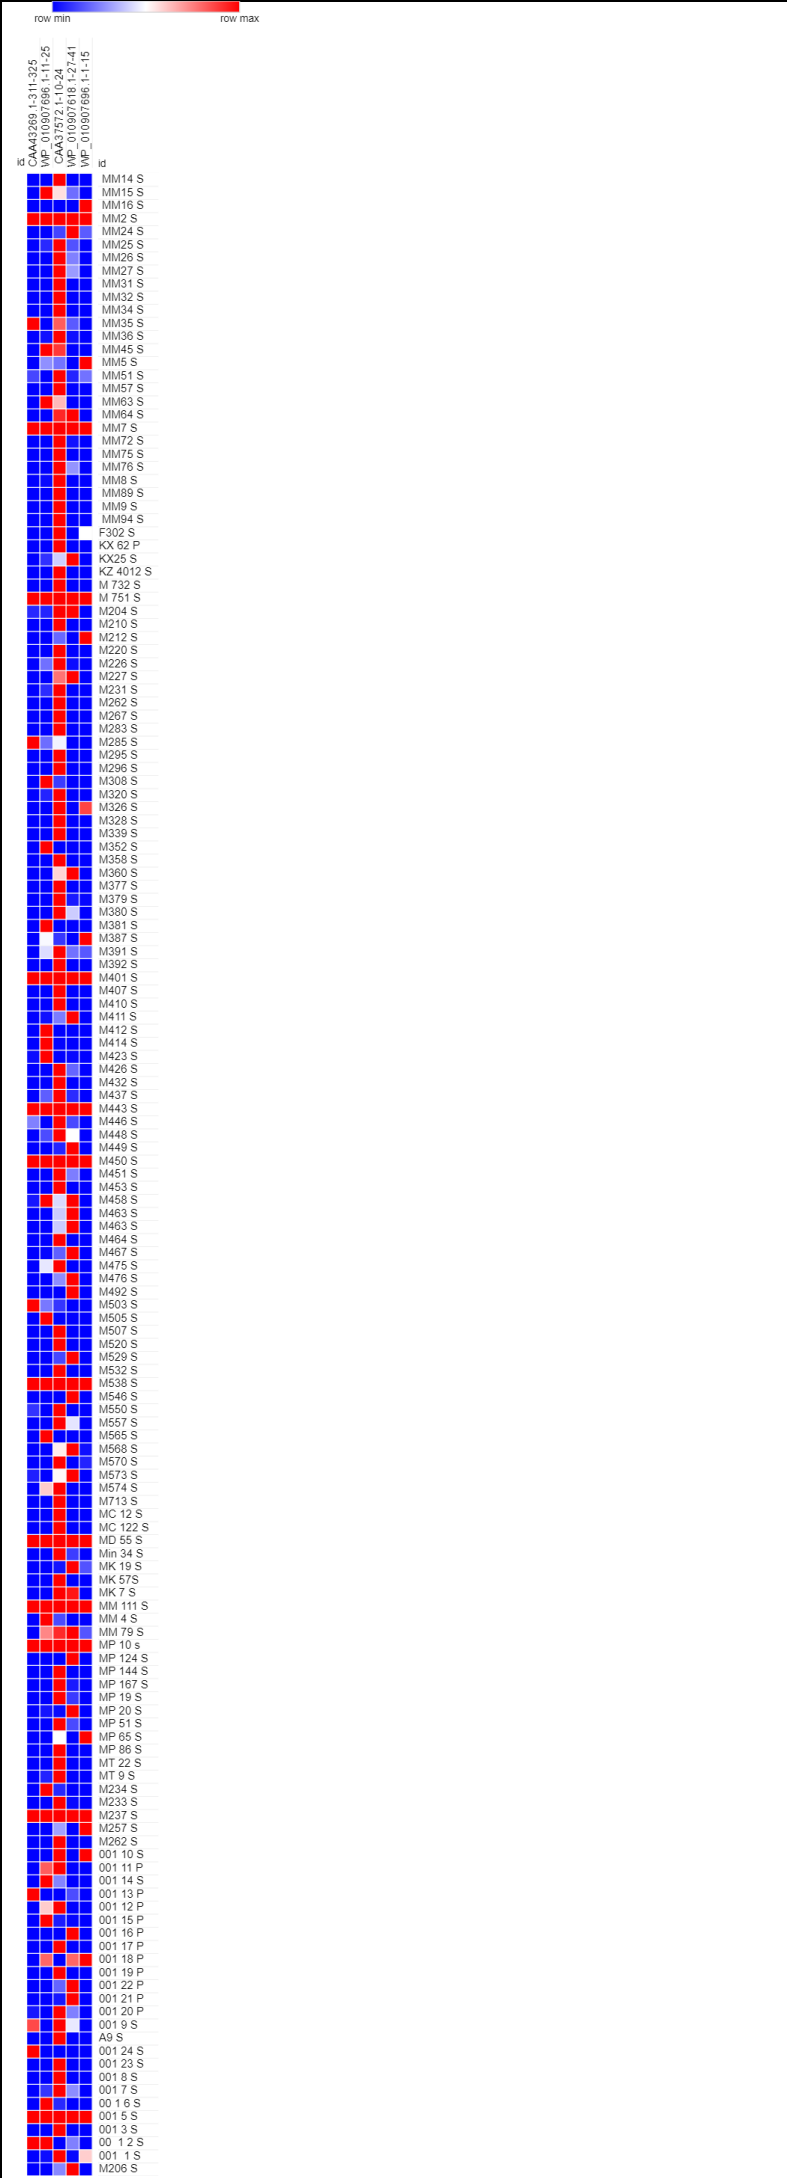

*Mycobacterium leprae* IgG heat map

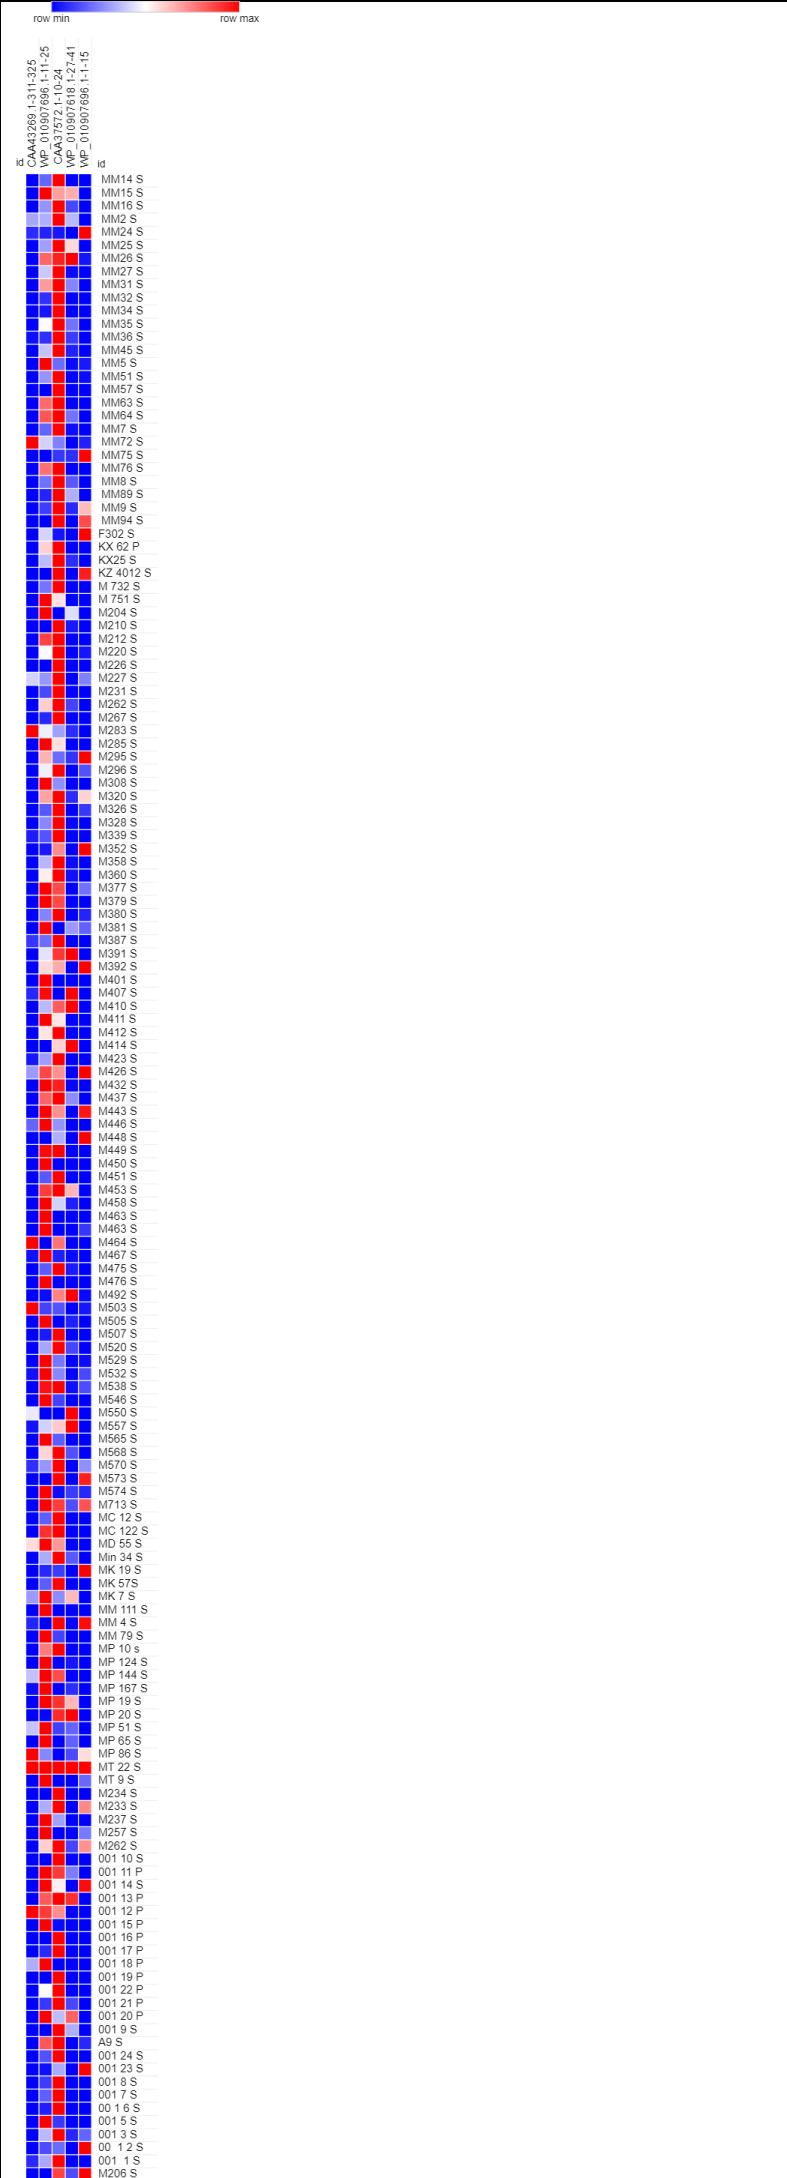

*Mycobacterium leprae* IgM heat map

### *Mycobacterium leprae*

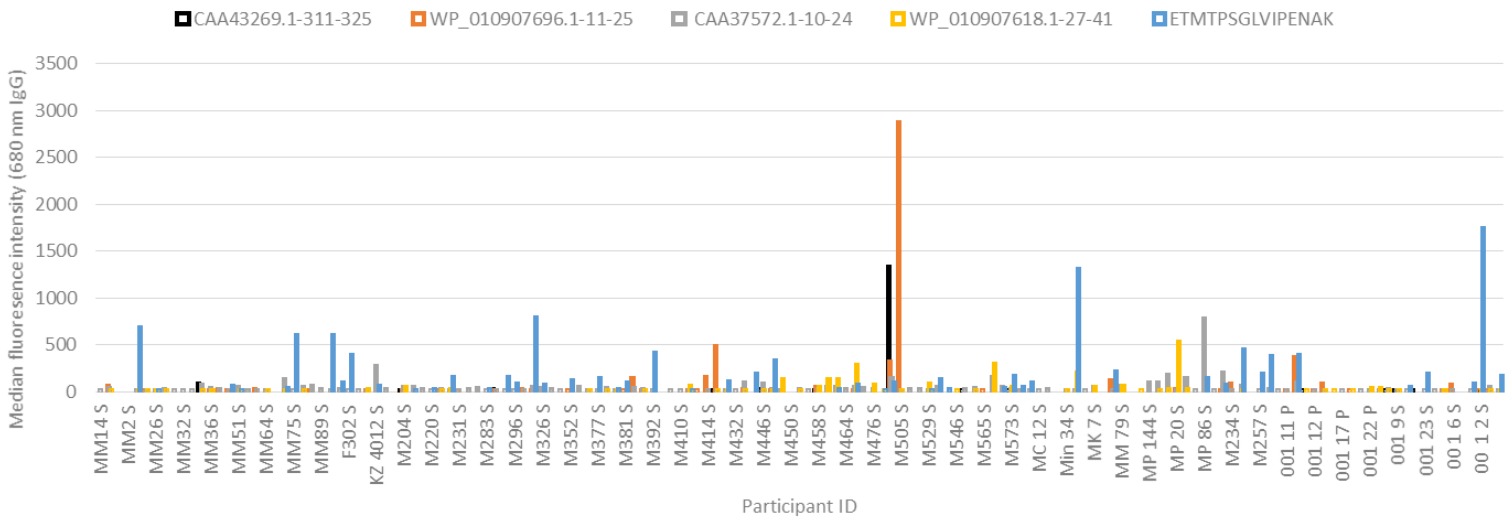

### *Mycobacterium leprae*

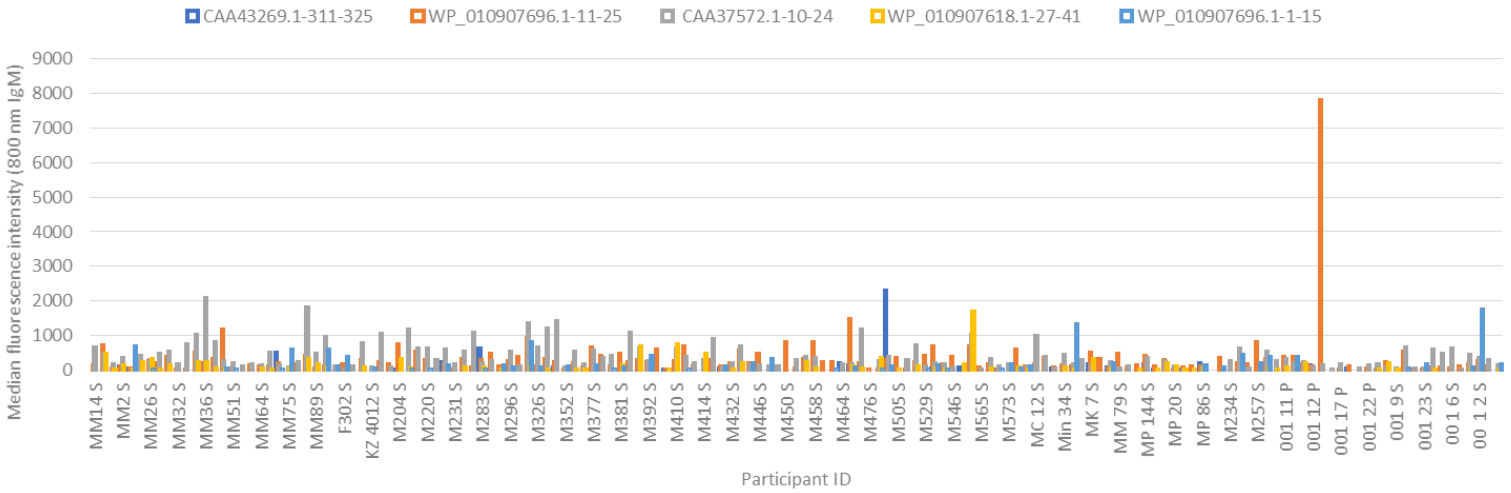

Heat maps and bar graphs generated from peptide microarray data for *Mycobacterium leprae*. A. Heat maps generated from peptide microarray. Samples are arranged in rows and infection status shown on the left key. Peptides shown by their protein accession number and sequence position are arranged in columns. B. Bar graphs representing the peptide reactivity for each serum and plasma in both the infected and uninfected groups in the study.

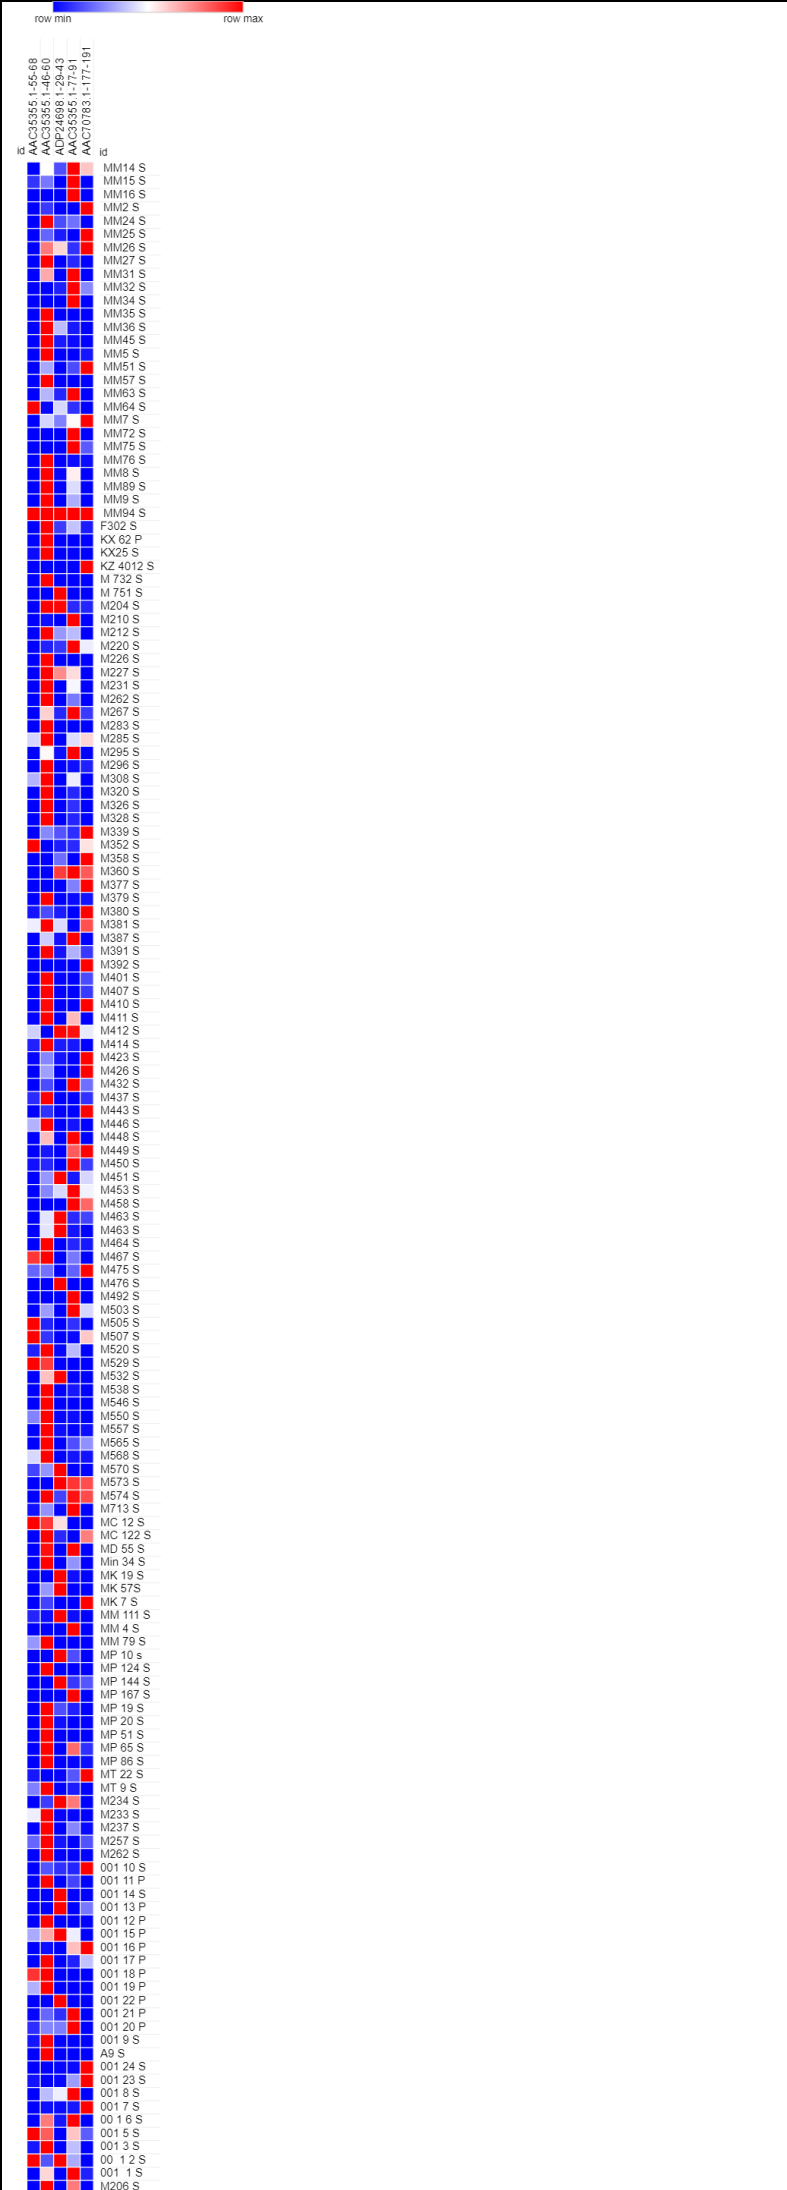

Wuchereria Bancroft IgG heat map

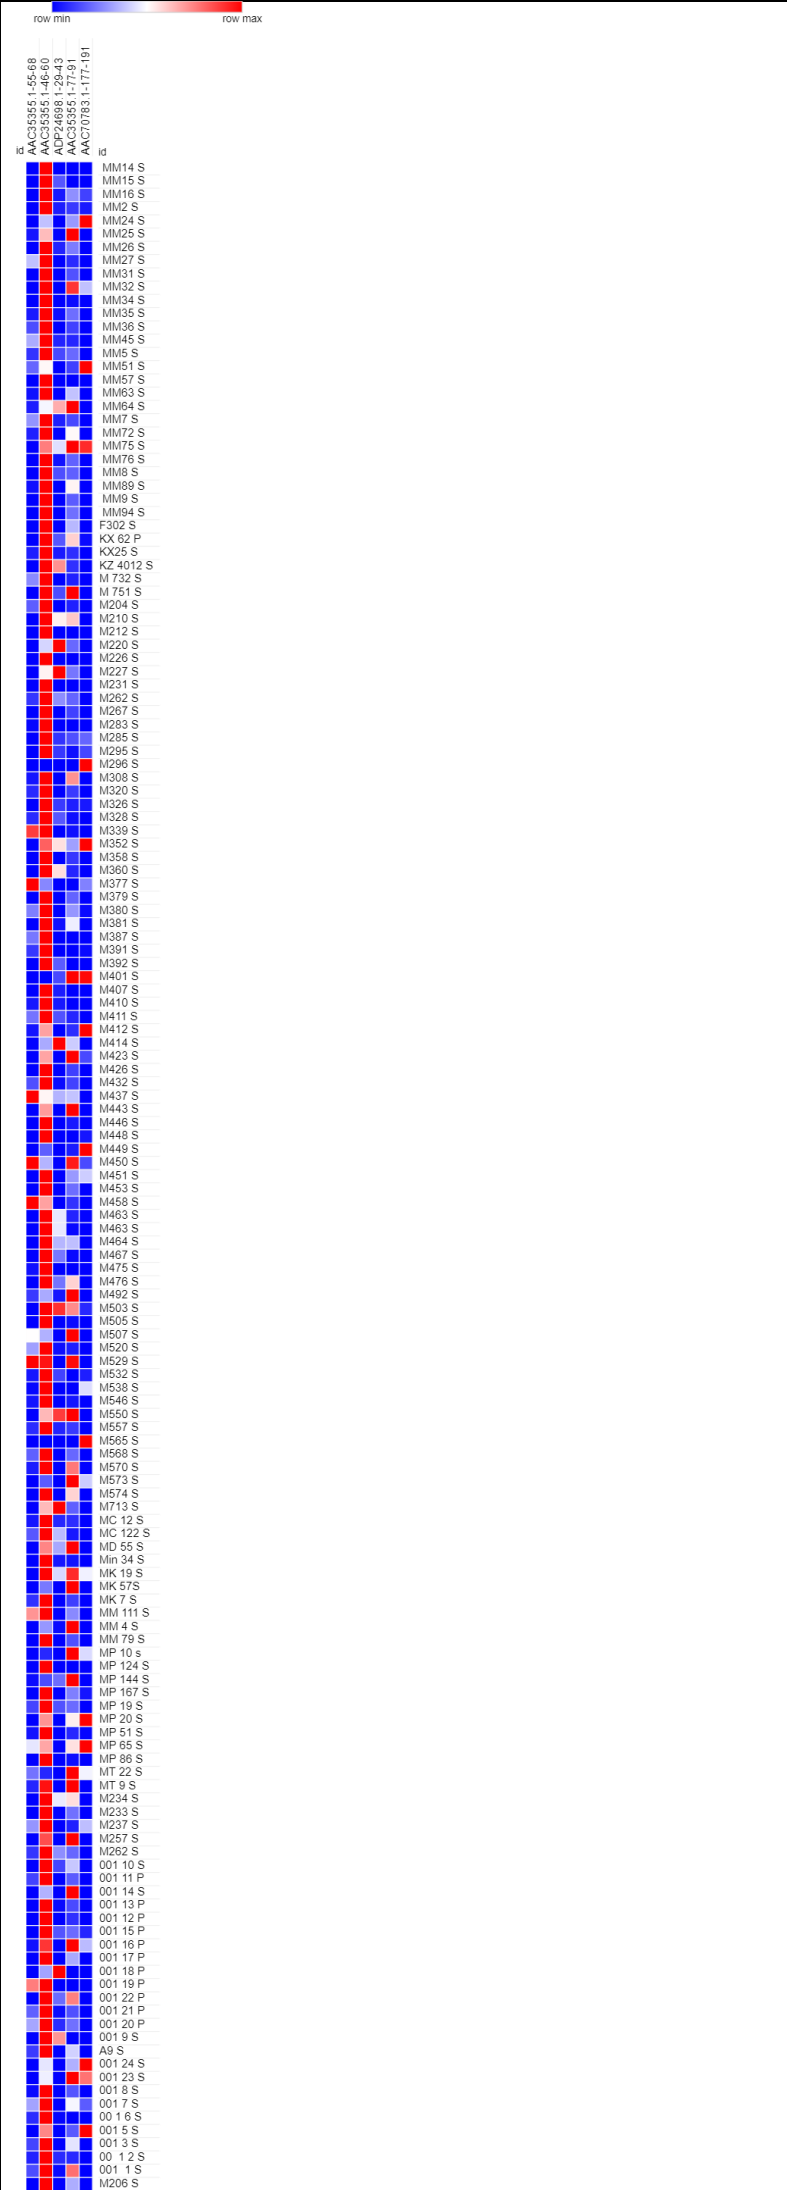

Wuchereria Bancroft IgM heat map

### *Wuchereria bancrofti*

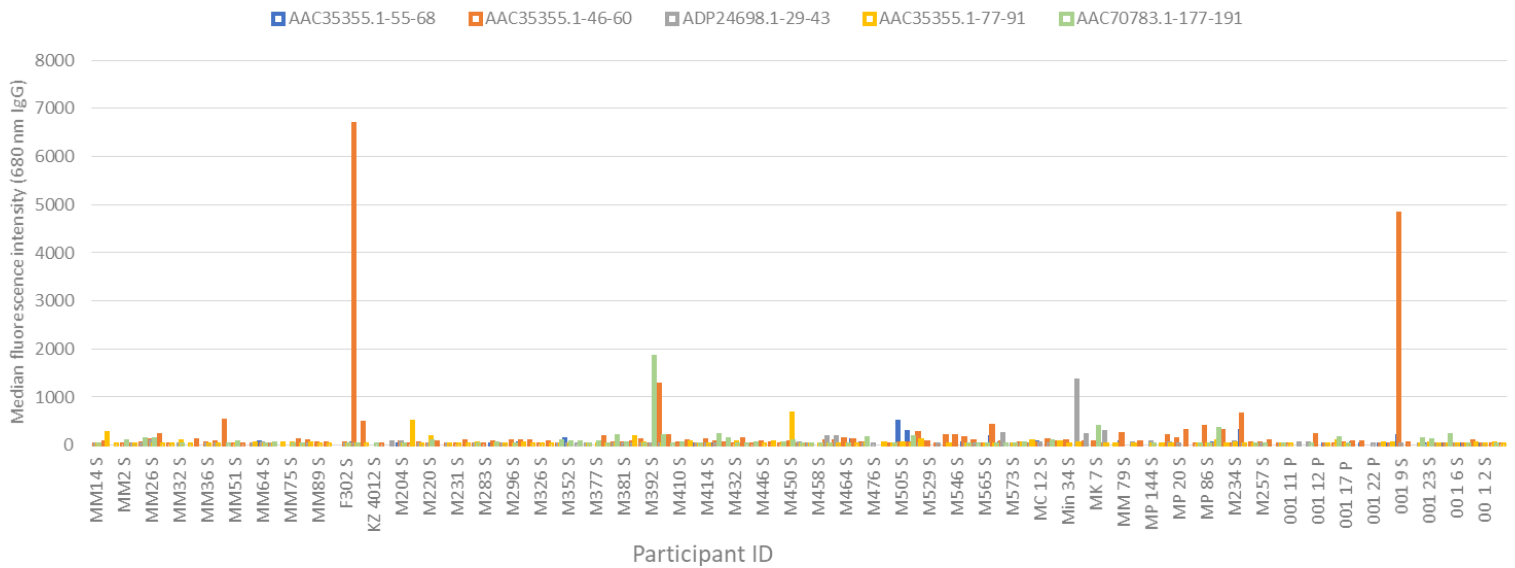

### *Wuchereria bancrofti*

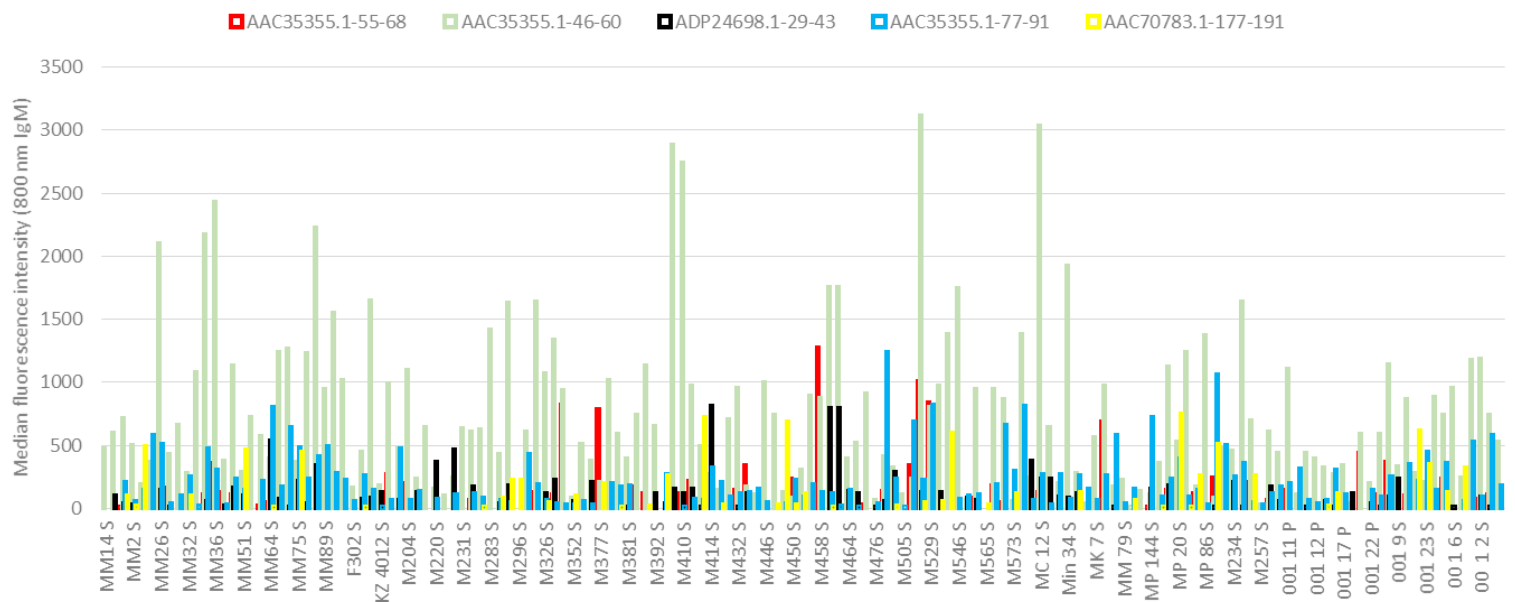

Heat maps and bar graphs generated from peptide microarray data for *Wuchereria Bancrofti* A. Heat maps generated from peptide microarray. Samples are arranged in rows and infection status shown on the left key. Peptides shown by their protein accession number and sequence position are arranged in columns. B. Bar graphs representing the peptide reactivity for each serum and plasma in both the infected and uninfected groups in the study.

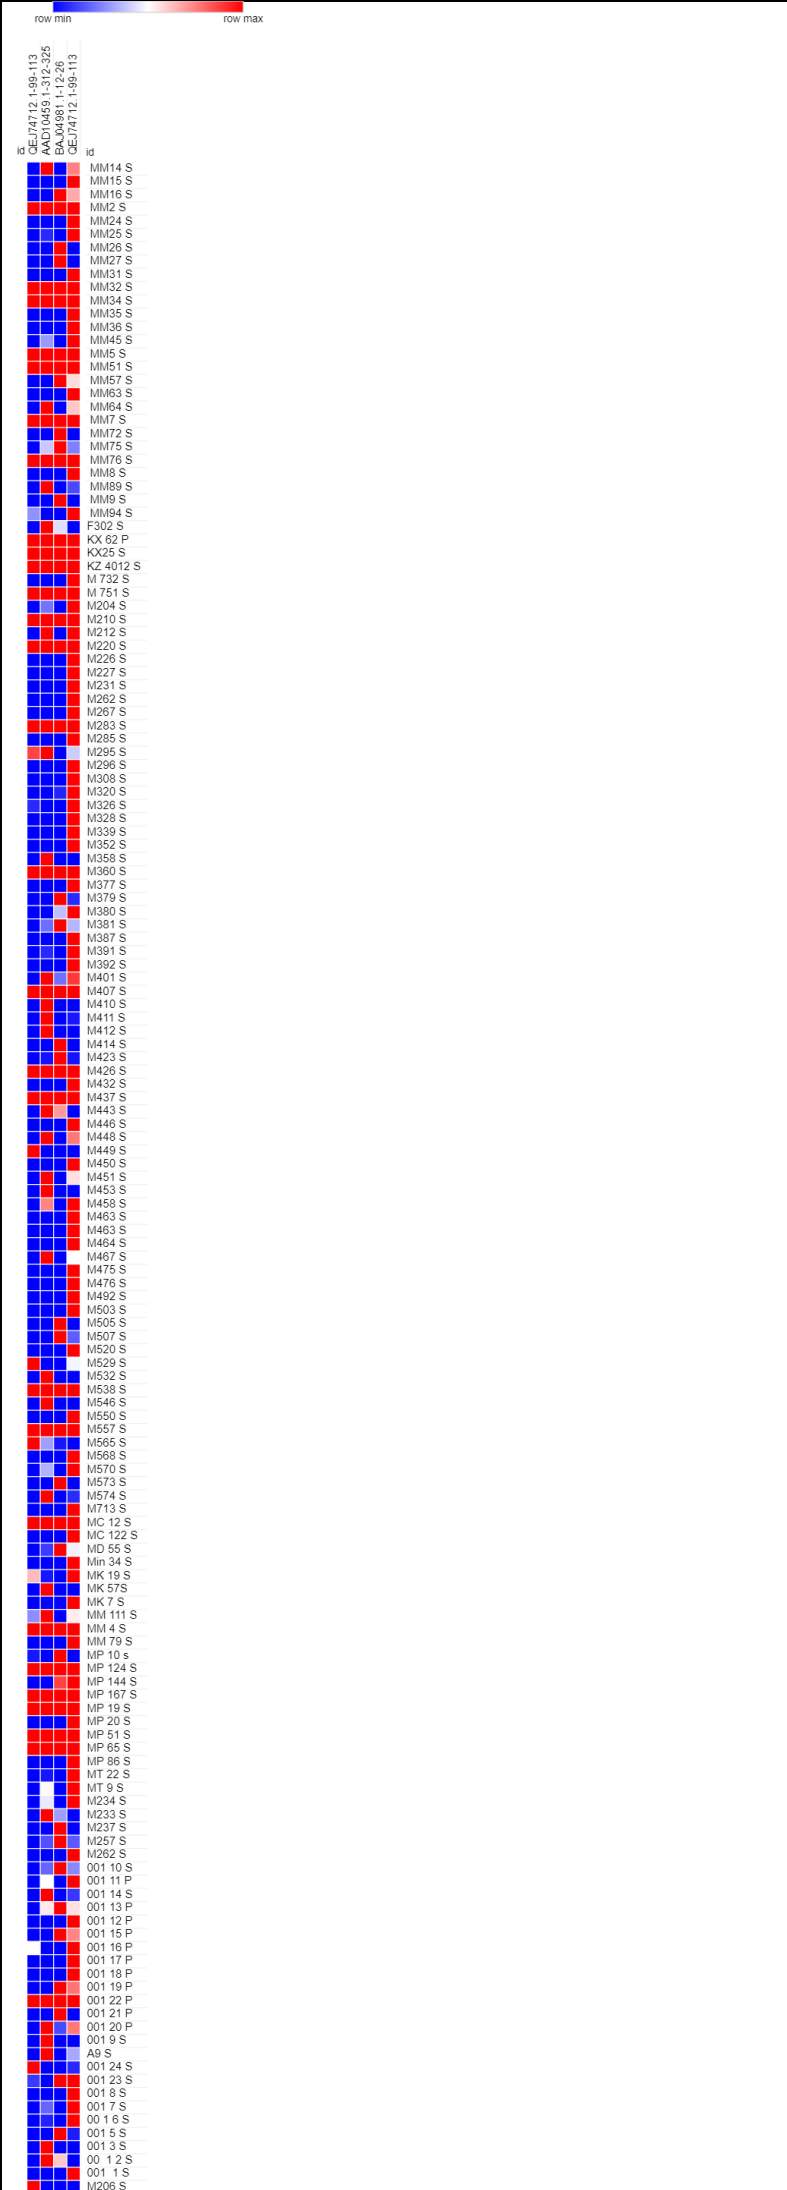

Rabies lyssavirus IgG heat map

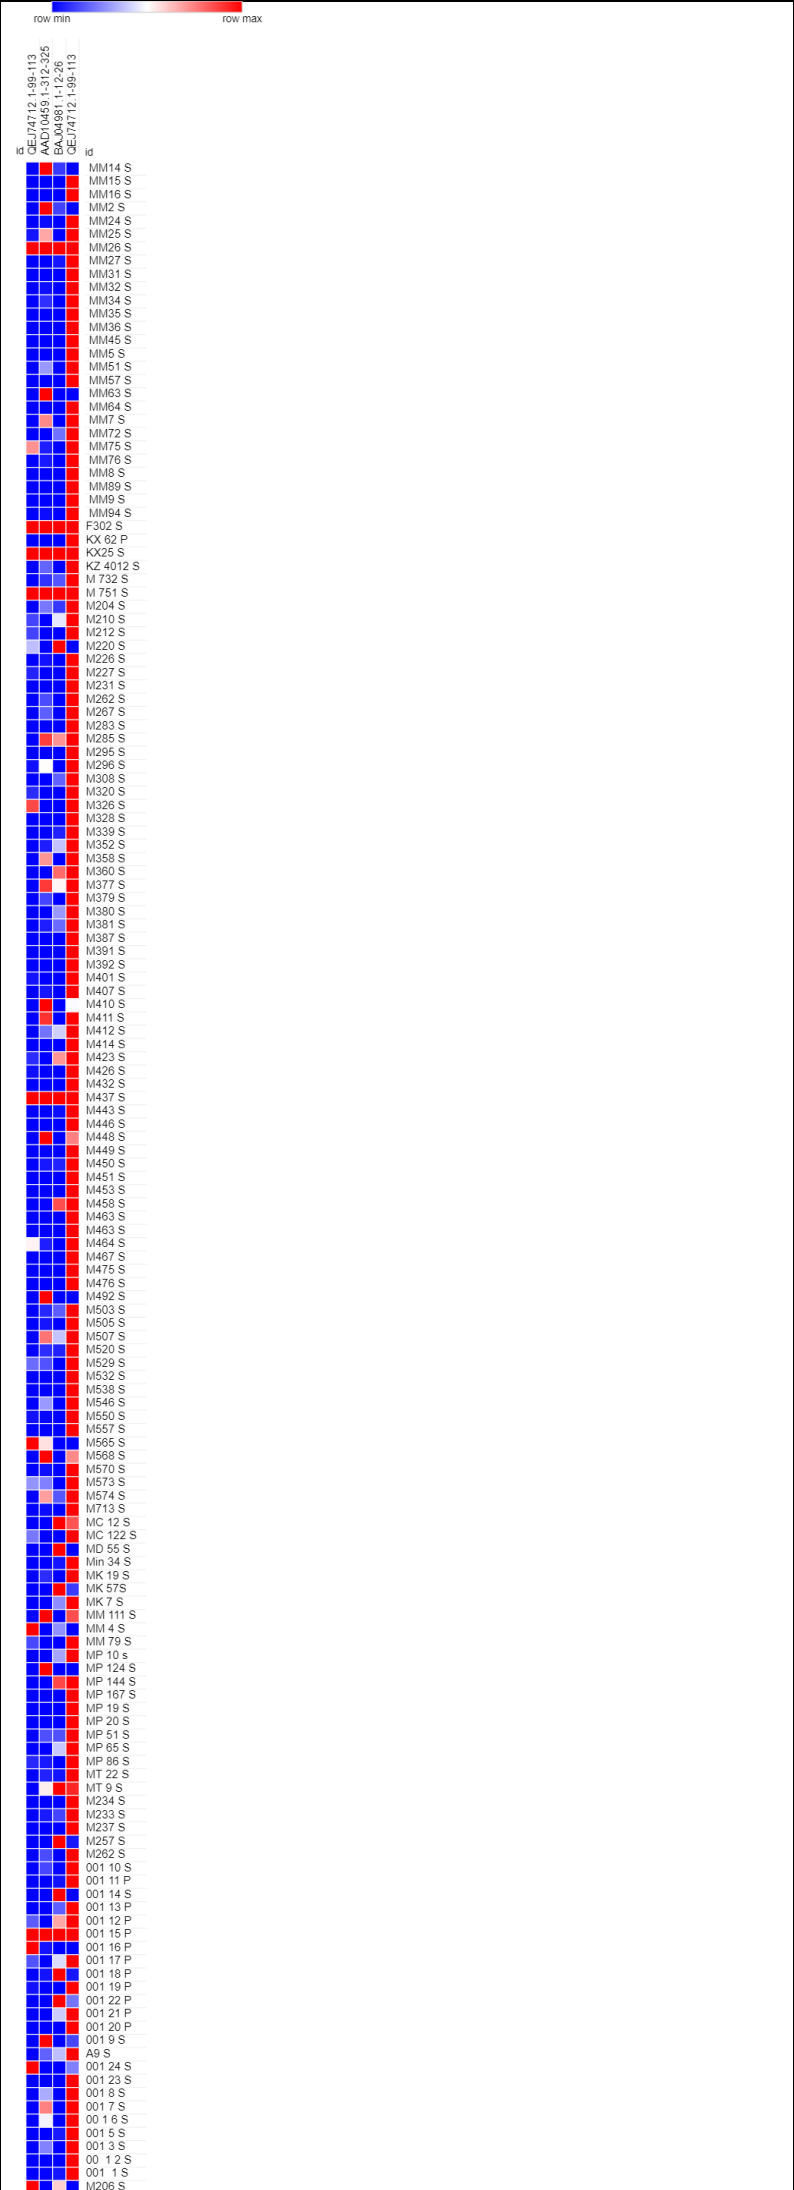

Rabies lyssavirus IgM heat map

## Rabies lyssavirus

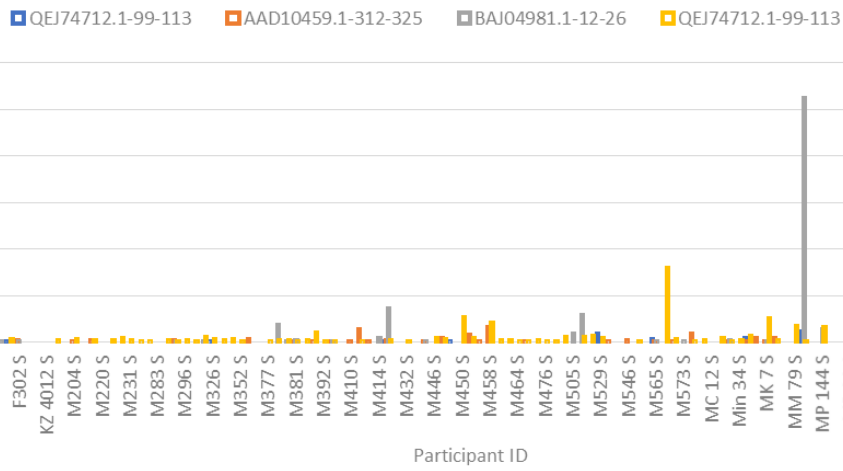

## Rabies lyssavirus

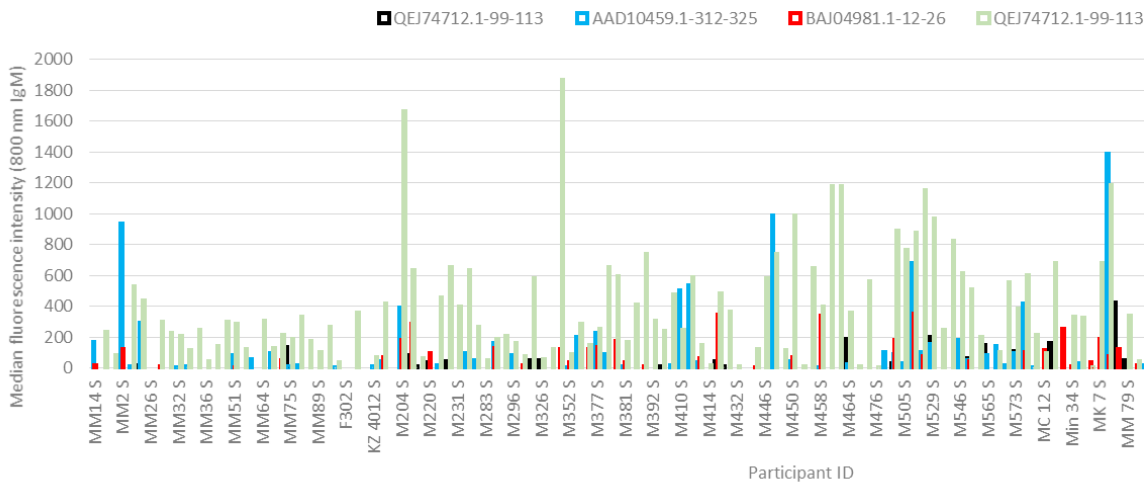

Heat maps and bar graphs generated from peptide microarray data for *Rabies lyssavirus* A. Heat maps generated from peptide microarray. Samples are arranged in rows and infection status shown on the left key. Peptides shown by their protein accession number and sequence position are arranged in columns. B. Bar graphs representing the peptide reactivity for each serum and plasma in both the infected and uninfected groups in the study.



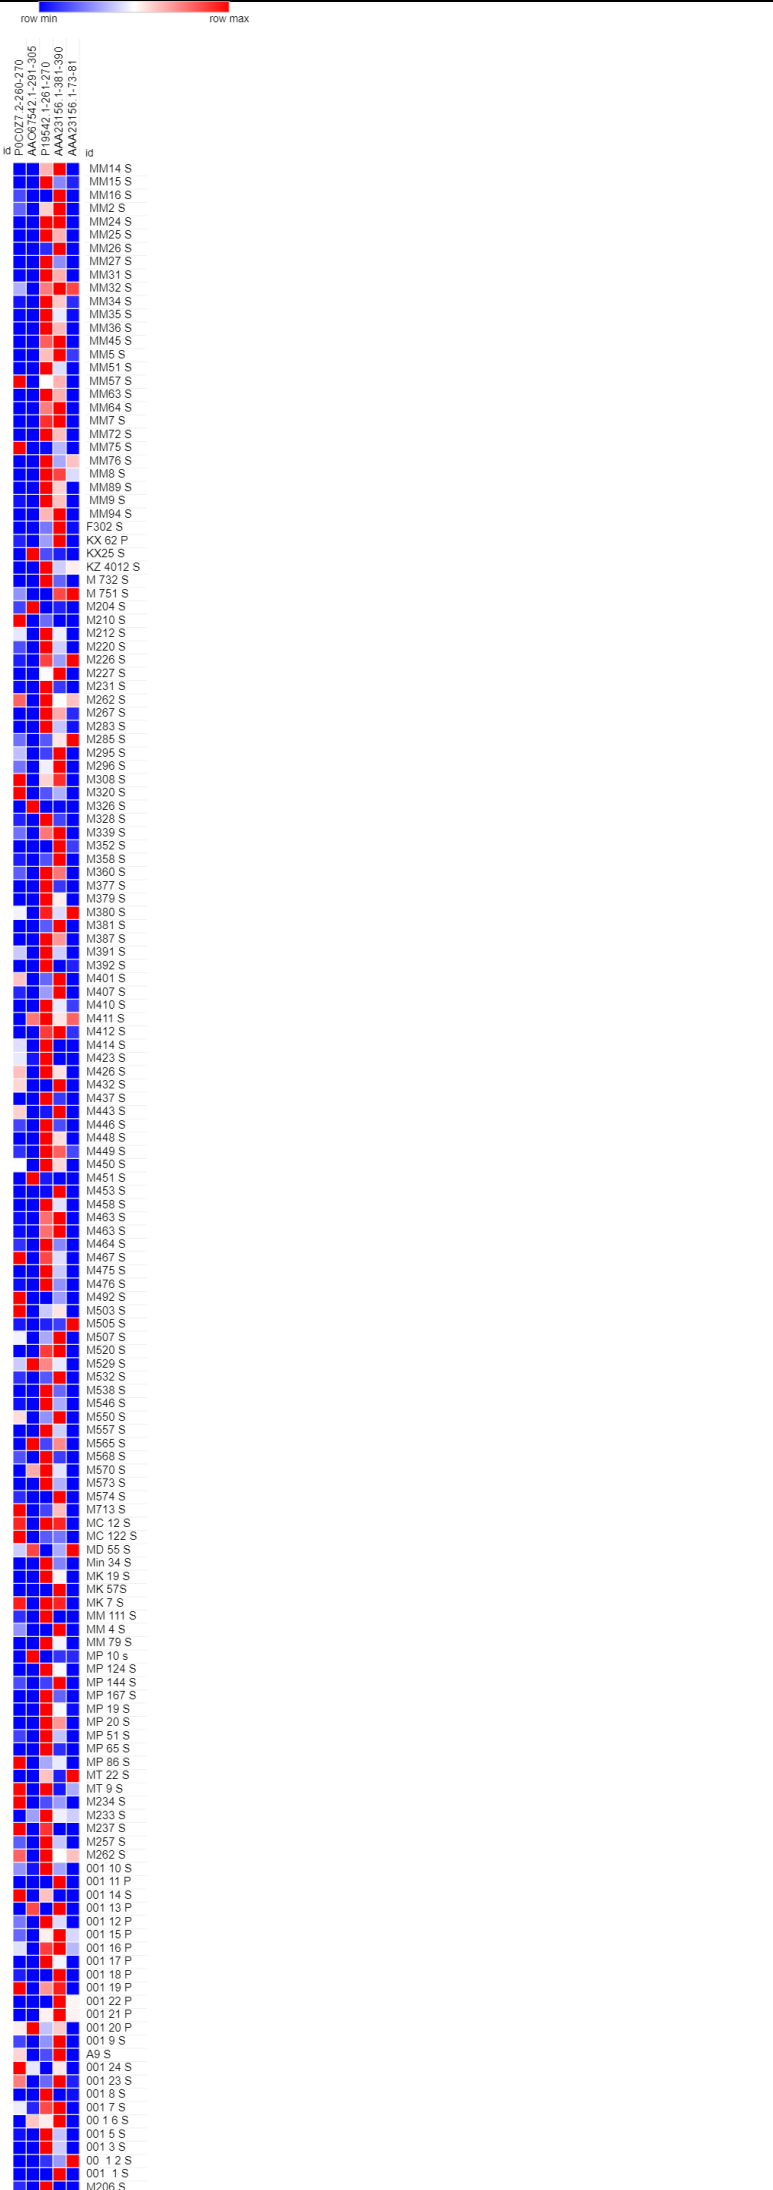

*Chlamydia trachomatis* IgG heat map

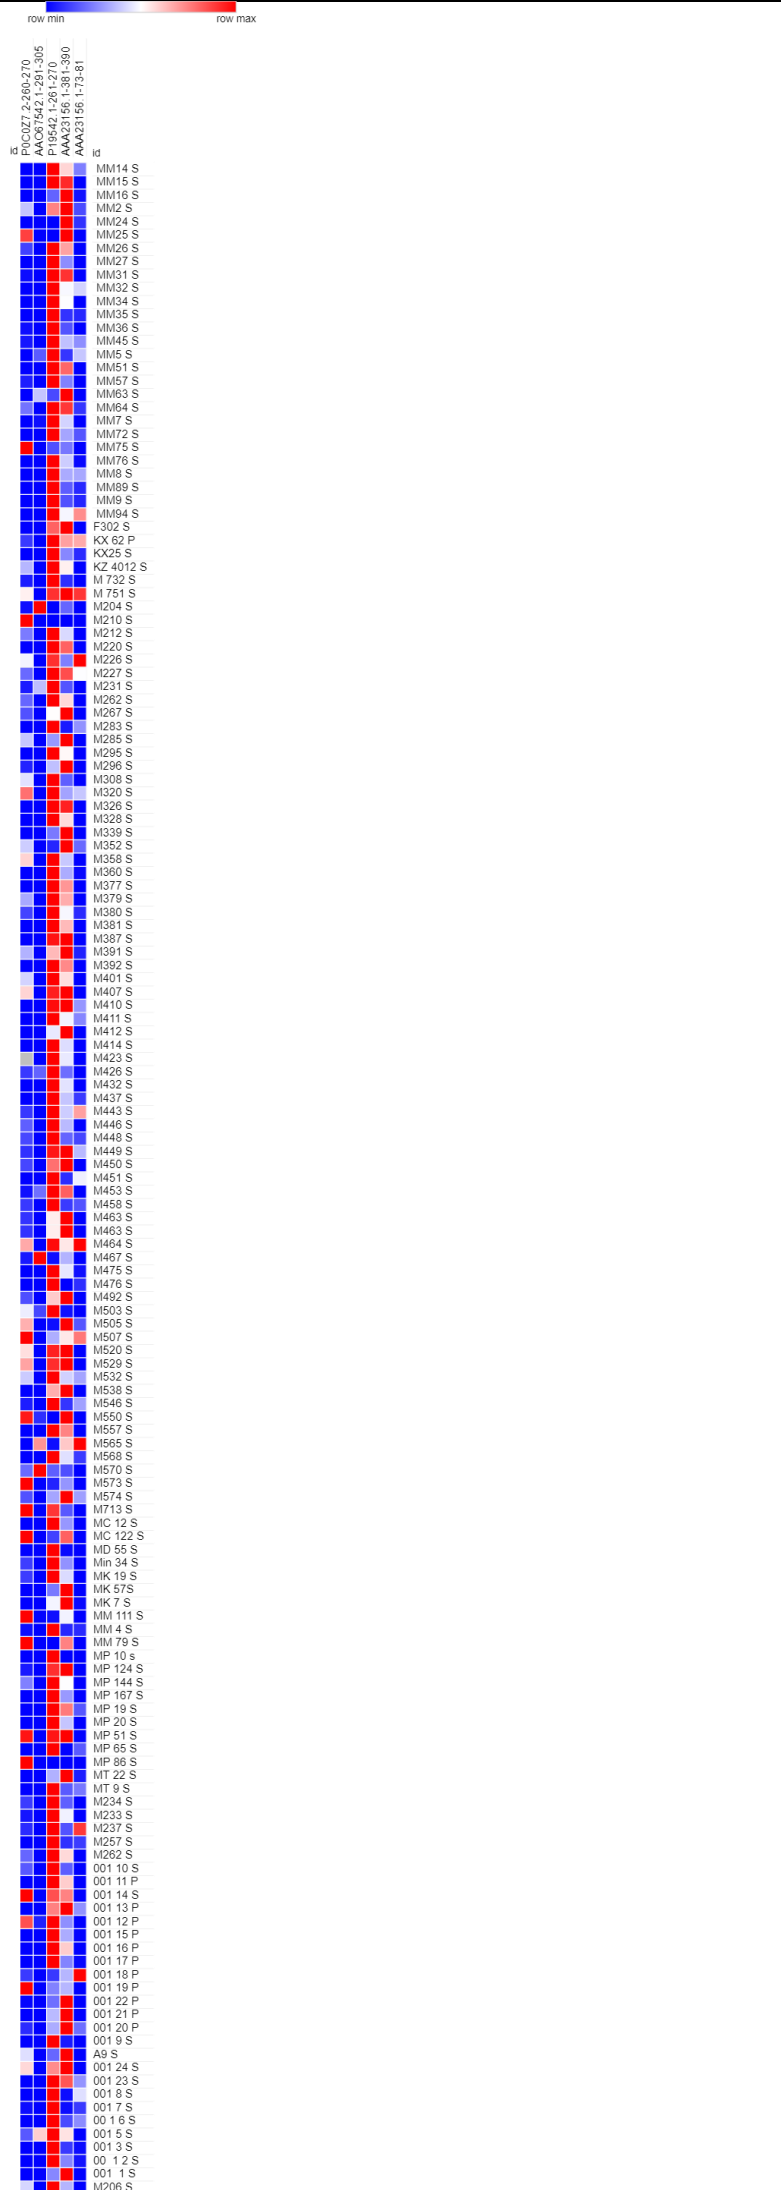

*Chlamydia trachomatis* IgM heat map

### *Chlamydia trachomatis*

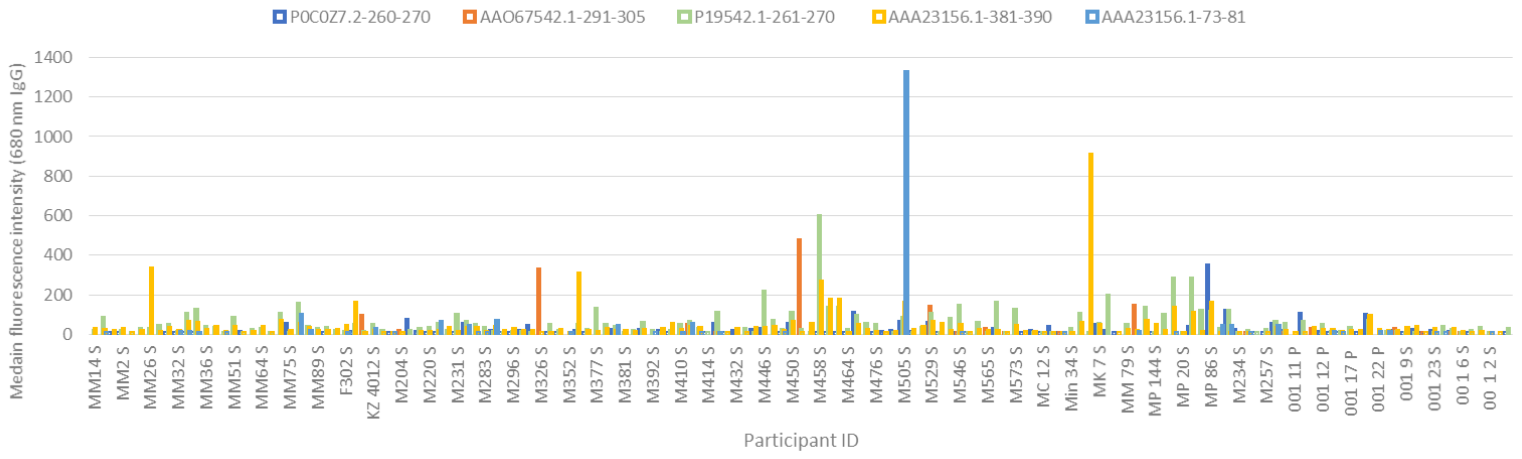

### *Chlamydia trachomatis*

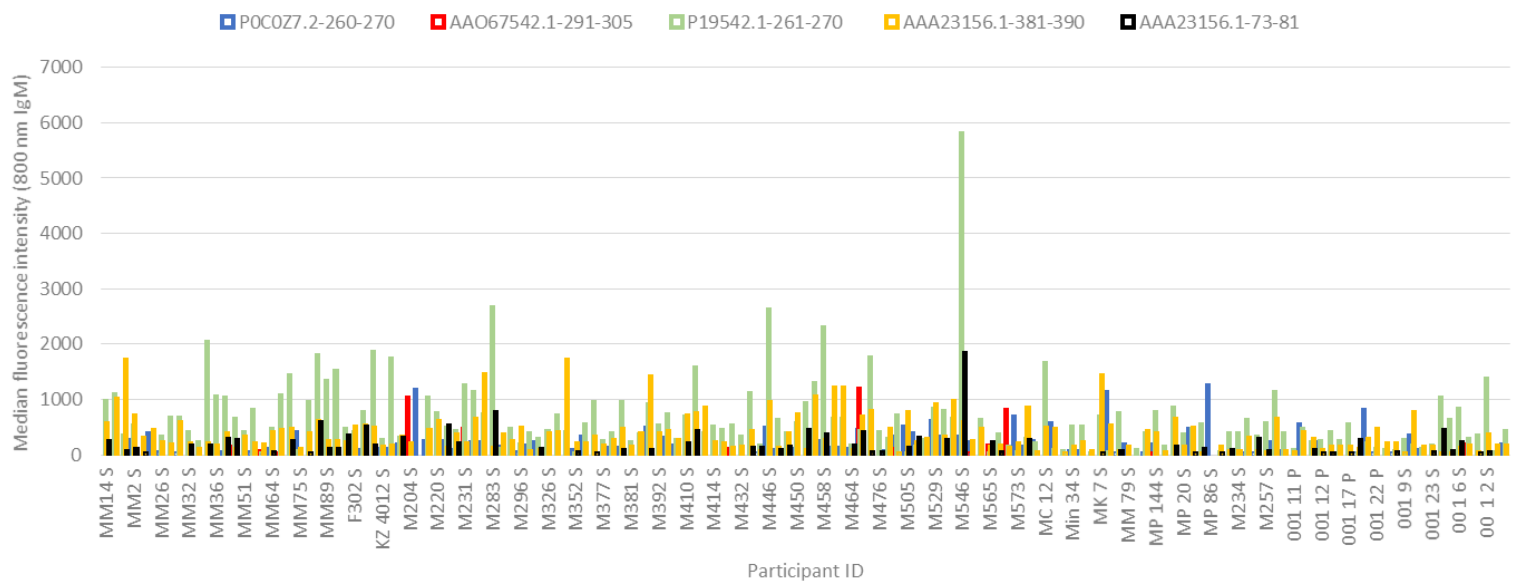

Heat maps and bar graphs generated from peptide microarray data for *Chlamydia trachomatis*. A. Heat maps generated from peptide microarray. Samples are arranged in rows and infection status shown on the left key. Peptides shown by their protein accession number and sequence position are arranged in columns. B. Bar graphs representing the peptide reactivity for each serum and plasma in both the infected and uninfected groups in the study.

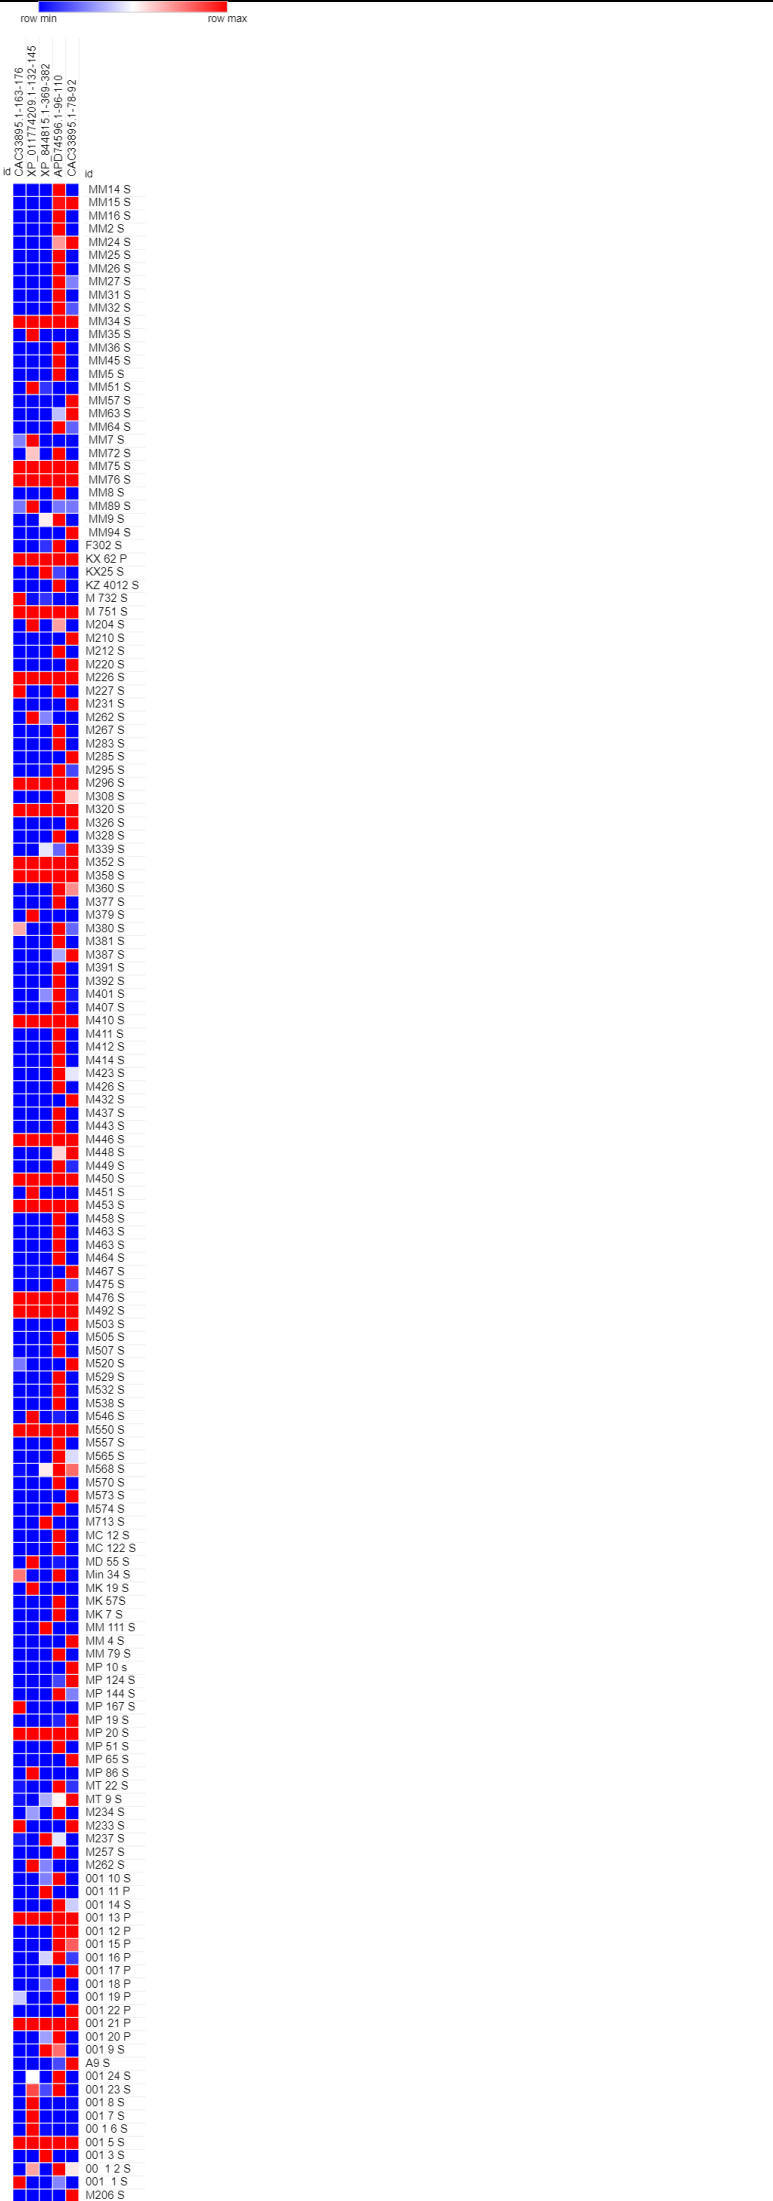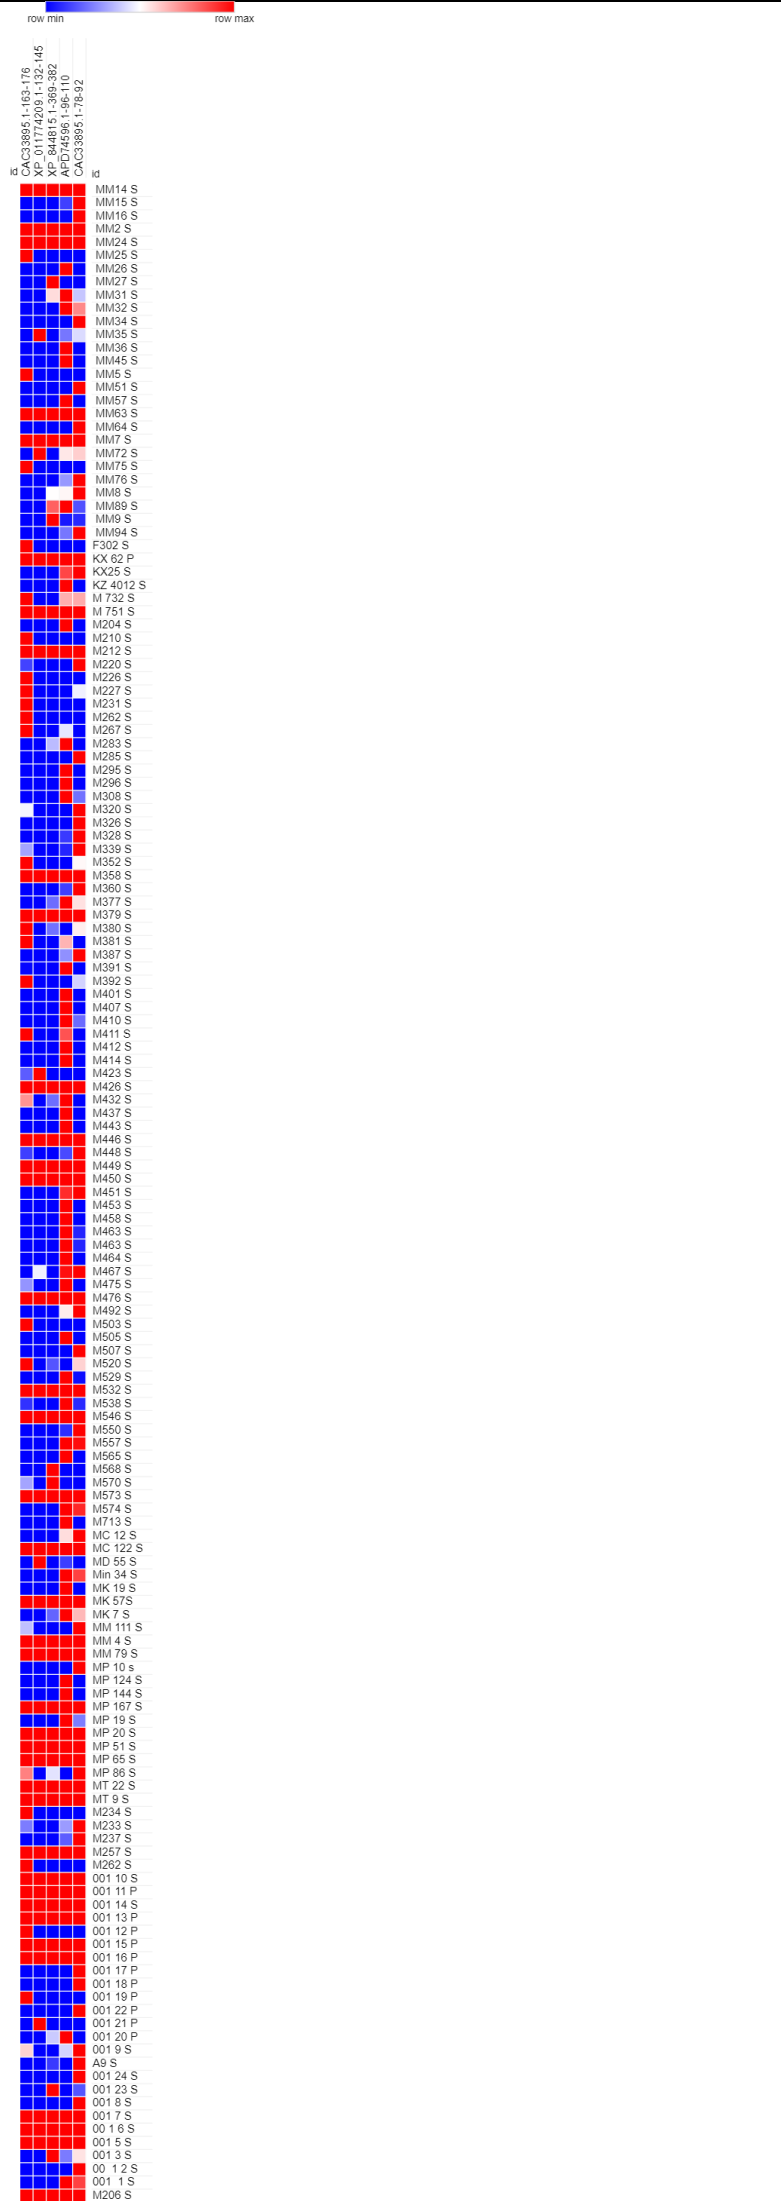

*Trypanosoma brucei* IgG heat map

*Trypanosoma brucei* IgG heat map

### Trypanosoma brucei

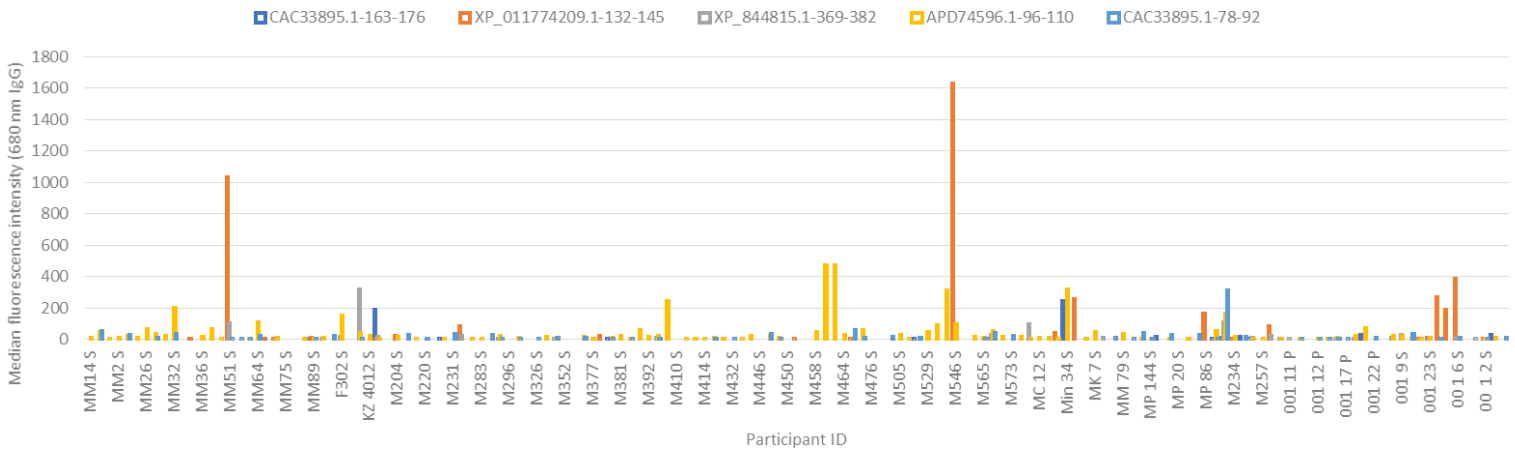

### Trypanosoma brucei

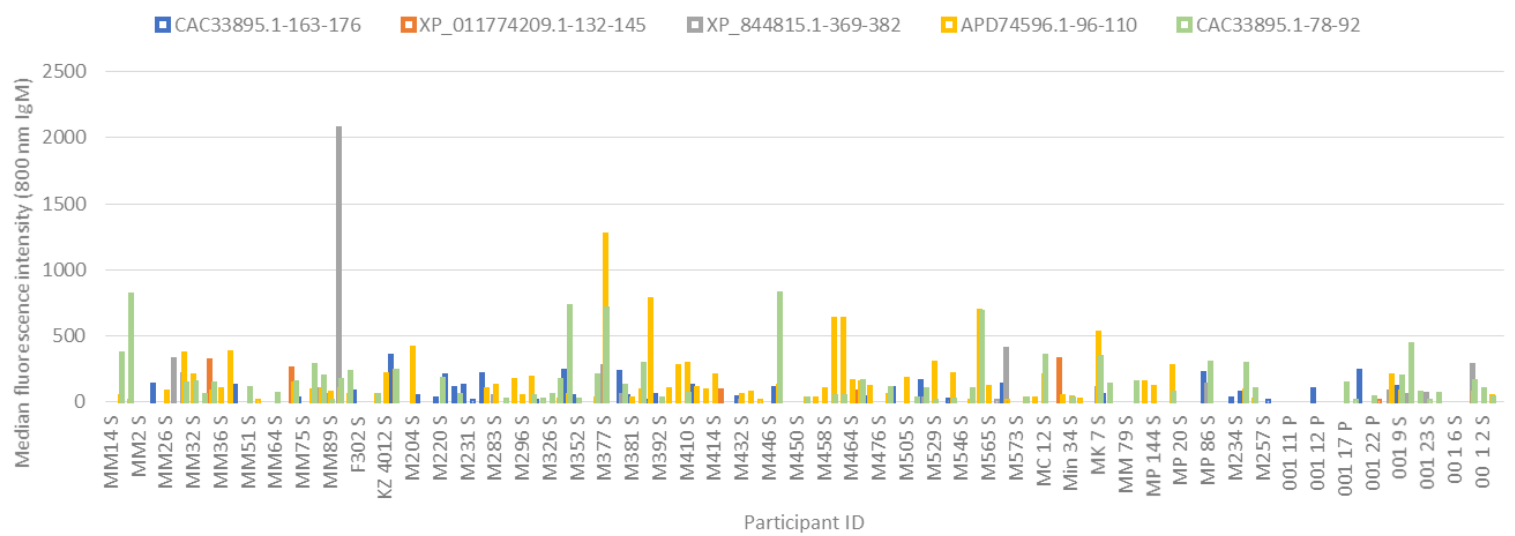

Heat maps and bar graphs generated from peptide microarray data for *Trypanosoma brucei* A. Heat maps generated from peptide microarray. Samples are arranged in rows and infection status shown on the left key. Peptides shown by their protein accession number and sequence position are arranged in columns. B. Bar graphs representing the peptide reactivity for each serum and plasma in both the infected and uninfected groups in the study.
