# Supplementary material for: Multiplex peptide microarray profiling of antibody reactivity against neglected tropical diseases derived B-cell epitopes for serodiagnosis in Zimbabwe
Source: PubMed Central journal article supplement (PMC9307155; doi:10.1371/journal.pone.0271916), 2022-07-22
Supplement: pone.0271916.s003.pdf [file pone.0271916.s003.pdf]

| <b>AUC</b> | <b>Quality of peptide/diagnostic performance</b> |
|------------|--------------------------------------------------|
| 1          | Perfectly accurate test                          |
| 0.9-1      | Outstanding                                      |
| 0.8-0.9    | excellent                                        |
| 0.7-0.8    | Fair/acceptable                                  |
| 0.6-0.7    | Poor                                             |
| 0.5-0.6    | Fail                                             |
| 0          | perfectly inaccurate test                        |
